# Supplementary material
Source: PubMed Central journal article supplement (PMC5993419)
Supplement: mmc2.pdf [file mmc2.pdf]

# Estimation of Genetic Correlation via Linkage Disequilibrium Score Regression and Genomic Restricted Maximum Likelihood

Guiyan Ni,<sup>1,2</sup> Gerhard Moser,<sup>1,2</sup> Schizophrenia Working Group of the Psychiatric Genomics Consortium, Naomi R. Wray,<sup>3,4</sup> and S. Hong Lee<sup>1,2,4,\*</sup>

Genetic correlation is a key population parameter that describes the shared genetic architecture of complex traits and diseases. It can be estimated by current state-of-art methods, i.e., linkage disequilibrium score regression (LDSC) and genomic restricted maximum likelihood (GREML). The massively reduced computing burden of LDSC compared to GREML makes it an attractive tool, although the accuracy (i.e., magnitude of standard errors) of LDSC estimates has not been thoroughly studied. In simulation, we show that the accuracy of GREML is generally higher than that of LDSC. When there is genetic heterogeneity between the actual sample and reference data from which LD scores are estimated, the accuracy of LDSC decreases further. In real data analyses estimating the genetic correlation between schizophrenia (SCZ) and body mass index, we show that GREML estimates based on ~150,000 individuals give a higher accuracy than LDSC estimates based on ~400,000 individuals (from combined meta-data). A GREML genomic partitioning analysis reveals that the genetic correlation between SCZ and height is significantly negative for regulatory regions, which whole genome or LDSC approach has less power to detect. We conclude that LDSC estimates should be carefully interpreted as there can be uncertainty about homogeneity among combined meta-datasets. We suggest that any interesting findings from massive LDSC analysis for a large number of complex traits should be followed up, where possible, with more detailed analyses with GREML methods, even if sample sizes are lesser.

Genetic correlation is a key population parameter that describes the shared genetic architecture of complex traits and diseases.<sup>1–3</sup> The genetic correlation is the additive genetic covariance between two traits scaled by the square root of the product of the genetic variance for each trait (i.e., the geometric mean of the trait variances). The sign of the correlation shows the direction of sharing, and the parameter definition is based on genetic variants across the allelic spectrum. Methods to estimate genetic correlation based on genetic covariance structure are well established for both quantitative and disease traits, e.g., (restricted) maximum likelihood for linear mixed models (LMM).<sup>4–6</sup> Genetic covariance structure can be derived from phenotypic records using pedigree information in twin or family-based designs.<sup>7</sup> Recently, genome-wide single-nucleotide polymorphism (SNP) data have been used to construct a genomic relationship matrix for the genetic covariance structure in LMM that captures the contribution of causal variants that are in linkage disequilibrium (LD) with the genotyped SNPs.<sup>4,8,9</sup> Such estimates assume that the genetic correlation estimated from common SNPs is representative of the parameter that depends on all genetic variants; this seems like a reasonable assumption.

In contrast to the genomic restricted maximum likelihood (GREML) approach, a linkage disequilibrium score regression (LDSC)<sup>10,11</sup> method does not require individual-level genotype data but instead uses GWAS summary statistics, regressing association test statistics of SNPs on

their LD scores. The LD score of a SNP is the sum of LD  $r^2$  measured with all other SNPs and can be calculated in a reference sample of the same ethnicity when individual genotype data are not available for the GWAS sample, under the assumption that the GWAS sample has been drawn from the same ethnic population as the reference sample used to calculate the LD scores. The method exploits the relationship between association test statistic and LD score expected under polygenicity. Because of this simplicity, and the massively reduced computing burden in terms of memory and time, it is feasible for LDSC to be applied to a large number of multiple traits, e.g., Bulik-Sullivan et al.,<sup>11</sup> Zheng et al.,<sup>12</sup> Finucane et al.<sup>13</sup>

Given the attractiveness of LDSC for a massive analysis of many sets of GWAS summary statistics, it has been widely used in the community. However, genetic correlations estimated by LDSC are often reported without caution although the approach is known to be less accurate, compared to GREML.<sup>11</sup> In fact, the accuracies of LDSC estimates have not been thoroughly studied.

In this report, we compare both the bias (difference between the simulated true value and estimated value) and accuracy (magnitude of the standard error of an estimate [SE]) between GREML and LDSC for estimation of genetic correlation. We find that both methods show little evidence of bias. However, LDSC is less accurate as reported in Bulik Sullivan et al.,<sup>11</sup> with SE at least more than 1.5-fold higher than that of GREML regardless of the number of samples in data used to estimate the genetic correlation.

<sup>1</sup>Centre for Population Health Research, School of Health Sciences and Sansom Institute of Health Research, University of South Australia, Adelaide, SA 5000, Australia; <sup>2</sup>School of Environmental and Rural Science, University of New England, Armidale, NSW 2351, Australia; <sup>3</sup>Institute for Molecular Bioscience, University of Queensland, Brisbane, QLD 4072, Australia; <sup>4</sup>Queensland Brain Institute, University of Queensland, Brisbane, QLD 4072, Australia

\*Correspondence: [hong.lee@unisa.edu.au](mailto:hong.lee@unisa.edu.au)

<https://doi.org/10.1016/j.ajhg.2018.03.021>

© 2018 American Society of Human Genetics.

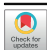

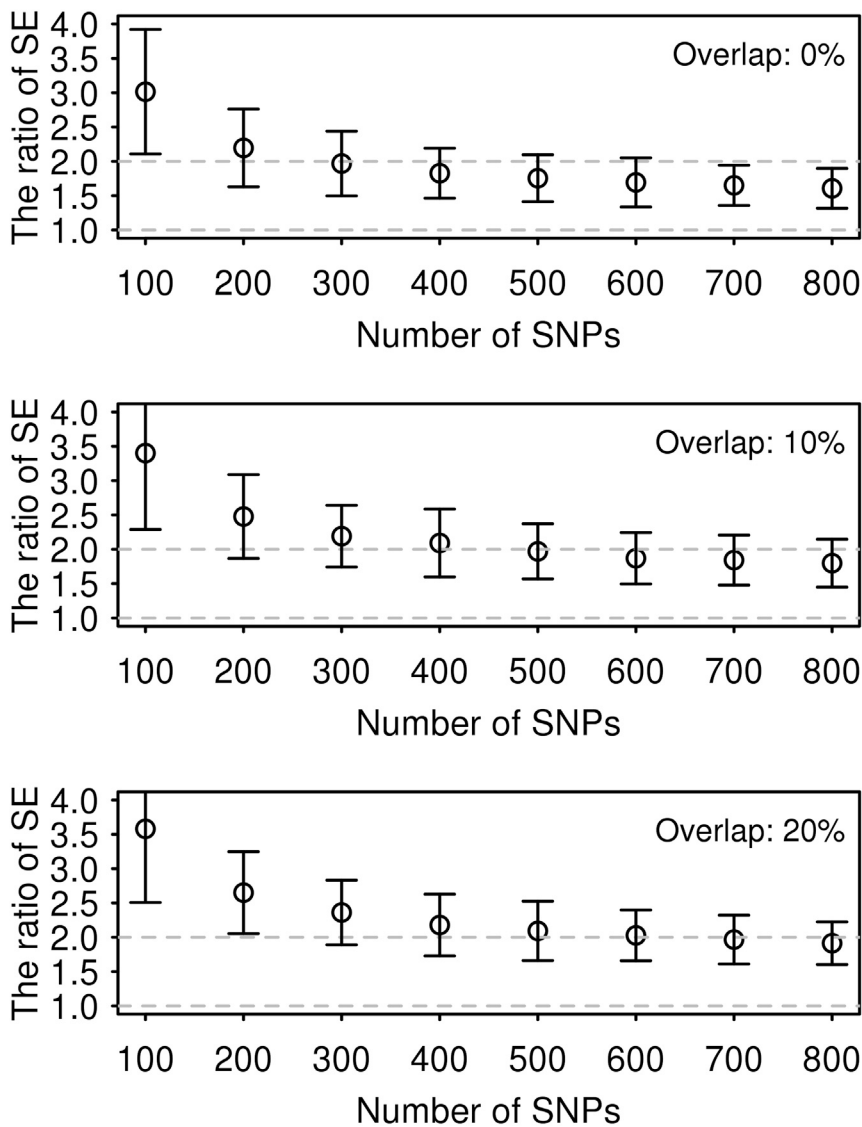

**Figure 1. The Ratio of SE of LDSC Estimate to that of GREML Estimate using Simulated Phenotypes Based on UK Biobank Genotypes**

Bars are 95% CI based on 100 replicates. The unit for the number of SNPs is thousands. This result was based on 858K SNPs (after QC) and 10,000 individuals that were randomly selected from UK Biobank. SNPs in each bin were randomly drawn from the 858K SNPs independently. The number of causal SNPs was 10,000 that were randomly selected in each bin. The true simulated value for the genetic correlation was 0.6 and that for the heritability was 0.5 for both traits. Overlap (0%, 10%, and 20%) stands for the percentage of overlapping individuals in the first and second traits.

homogeneity. Furthermore, a GREML genomic partitioning analysis reveals that the genetic correlation between SCZ and height is significantly negative for regulatory regions, which is less obvious by LDSC when using both whole-genome and partitioned estimates of genetic correlation.

In the main methods, we used GREML<sup>14,15</sup> and LDSC<sup>10,11</sup> to compare their estimates of genetic correlation using simulated as well as real data. Simulations were based on UK Biobank imputed genotype data (UKBB<sup>16</sup>) after stringent quality control (QC) (see [Supplemental Methods](#)). We calculated a ratio of empirical SE and its 95% confidence interval (CI) to assess the accuracy of

the methods for each set of simulated data. The 95% CIs of SE were estimated based on the delta method.<sup>17</sup> When estimating genetic correlation using simulated phenotypes based on UKBB genotype data, we found that the estimates were unbiased for both GREML and LDSC ([Figure S1](#)), but the SE of GREML was at least 1.5 times smaller than that of LDSC ([Figure 1](#)). The ratio of the empirical SE from LDSC to GREML was increased up to 3.5-fold when using a smaller number of SNPs ([Figure 1](#)). All values of the ratio were significantly different from 1. It is notable that the SE of GREML estimates showed almost no difference across different numbers of SNPs whereas that of LDSC estimates gradually increased with a smaller number of SNPs ([Figure S2](#)). The ratio was invariant to sample size ([Figure S3](#)). As expected, when using the intercept constrained to zero, LDSC estimates were substantially biased when there were overlapping samples ([Figure S4](#)). We also explored alternative genetic architectures ([Figure S5](#)), which consistently showed that GREML gives a smaller SE than LDSC in any scenario.

When decreasing the number of SNPs, the accuracy of LDSC decreases further. When increasing the degree of genetic heterogeneity between the actual sample and reference data from which LD scores are estimated, the SE of LDSC estimates are up to 3-fold larger than those of the GREML estimates. We also show that GREML is more accurate in genomic partitioning analyses over LDSC or stratified LDSC (sLDSC). In genomic partitioning analyses, the genetic parameters are estimated for genomic subsets defined by user-specified annotations. In analyses of real data, we show that GREML is more accurate and powerful, e.g., GREML estimates based on ~150,000 individuals give a higher accuracy than LDSC estimates based on 400,000 individuals in estimating genetic correlation between schizophrenia (SCZ) and body mass index (BMI) ( $-0.136$  [SE = 0.017] and  $p$  value =  $4.54E-15$  for GREML versus  $-0.087$  [SE = 0.019] and  $p$  value =  $4.91E-06$  for LDSC). In these analyses, the GREML estimate is based on UK sample only whereas the LDSC estimate is based on combined meta-datasets among which there is uncertainty about

**Table 1. Correlation between LD Scores Estimated Based on the HapMap3 SNPs using the 1KG CEU Reference Sample and that from Different Target Populations**

|                   | Correlation | Nr.SNPs              |
|-------------------|-------------|----------------------|
| UKBB <sup>a</sup> | 0.946       | 858,991              |
| UKBB <sup>b</sup> | 0.720       | 123,615 <sup>c</sup> |
| WTCCC2            | 0.899       | 421,035 <sup>c</sup> |
| GERA              | 0.661       | 238,089 <sup>c</sup> |

<sup>a</sup>UKBB was imputed to the combined data of the 1KG reference and UK10K data.

<sup>b</sup>UKBB<sup>b</sup> was based on the raw genotype data of UK Biobank data.

<sup>c</sup>The number of SNPs reduced further from the set of the QCed SNPs because of using only SNPs matched with the HapMap3 SNPs used in calculating LD scores.

To explore the stability of the accuracy for both methods, we used two additional genotype datasets without imputation, Wellcome Trust Case Control Consortium 2 (WTCCC2<sup>18–21</sup>) and genetic epidemiology research on adult health and aging cohort (GERA<sup>22,23</sup>), which are publicly available (see [Supplemental Methods](#) for detailed data descriptions). We also used UKBB raw (non-imputed) genotype data (UKBB<sup>b</sup>). We calculated the correlation between the LD scores for the HapMap3 SNPs estimated based on the 1KG CEU reference sample (see [Web Resources](#)) and those based on in-sample genotype data, i.e., UKBB, WTCCC2, GERA, and UKBB<sup>b</sup> dataset ([Table 1](#)). We found that the WTCCC2, GERA, and UKBB<sup>b</sup> (raw) genotypes were less similar to the 1KG reference genotypes, compared to the UKBB (imputed) genotypes (noting that UKBB samples had been imputed to the combined data of 1KG reference and UK10K data). [Table 2](#) shows that the SE ratio of LDSC estimate to GREML estimate was higher for WTCCC2, GERA, and UKBB<sup>b</sup> than that for UKBB. [Figure 2](#) shows that the accuracy of GREML was consistent across different datasets, whereas that of LDSC was decreased for WTCCC2, GERA, or UKBB<sup>b</sup>, compared to UKBB dataset. This was probably due to higher (or lower) correlation between LD scores based on the 1KG reference and the in-sample genotype datasets ([Table 1](#)) which might positively or (negatively) affect the accuracy of LDSC estimates. For WTCCC2, GERA, and UKBB<sup>b</sup> data, the SE ratio of LDSC to GREML based on different number of individuals is shown in [Figures S6–S8](#).

Genome partitioning analyses are an emerging tool to estimate the genetic variance and covariance explained by functional categories (e.g., DNase I hypersensitive sites [DHS] and non-DHS<sup>24</sup>). Currently, genomic partitioning analyses focus on SNP-heritability enrichment analyses, formally testing for enrichment of signal compared to the expectation that the estimates are proportional to the number of SNPs allocated to each annotation. Considering genomic partitioning in cross-disorder analyses is a natural extension to identify regions where genetic correlations between disorders are highest and lowest. Here, we assessed the performance of the methods in the context of genome partitioning analyses using simulated phenotypes

**Table 2. The Ratio of SE of LDSC Estimate to That of GREML Estimate using Simulated Phenotypes Based on UKBB, WTCCC2, GERA, and UKBB<sup>b</sup> Genotypes in the Scenarios without Overlapping Individuals**

|                   | 800k        | 400k        | 200k        | 100k        |
|-------------------|-------------|-------------|-------------|-------------|
| UKBB              | 1.60 (0.15) | 1.70 (0.18) | 1.85 (0.25) | 2.04 (0.33) |
| WTCCC2            | NA          | 2.15 (0.31) | 2.35 (0.43) | 2.68 (0.61) |
| GERA              | NA          | NA          | 2.87 (0.56) | 3.31 (1.17) |
| UKBB <sup>b</sup> | NA          | NA          | NA          | 3.74 (0.79) |

based on UKBB genotype data. A better LDSC approach to estimate genetic correlation for each category might be sLDSC, stratifying by genomic annotation; however, this method is currently under development (i.e., there is software [see [Web Resources](#)], but there is no published document or paper verifying the method). Nonetheless, since the sLDSC is available to the research community, we applied both LDSC and sLDSC to estimate partitioned genetic correlations for the simulated data ([Supplemental Methods](#)). For genome partitioning analyses, we showed that LDSC estimates of genetic correlation were biased whether using LD scores estimated from the 1KG reference or in-sample data (UKBB) while GREML estimates gave unbiased estimates for each functional category ([Figure 3](#)). sLDSC estimates were unbiased only when using LD scores from the in-sample data, and their SEs are relatively larger than those of GREML or LDSC ([Figure 3](#)). This was probably due to the fact that the different distribution of causal variants and their effects between DHS and non-DHS regions were better captured by an explicit covariance structure fitted in GREML. We also applied the methods to a range of simulation scenarios and found similar results in that GREML performed better than LDSC or sLDSC ([Figure S9](#) and [Table S1](#)), which was consistent with the previous results ([Figures 1](#) and [2](#)). It is notable that in a deliberately severe scenario (e.g., causal variants are simulated only within few kb of a boundary), GREML could give biased estimation of genetic correlation.<sup>13,24</sup>

While focusing on the accuracy of genetic correlation estimates, there is an important implication for the bias in SNP-heritability estimates for both GREML and LDSC ([Figure S10](#)). When using the WTCCC2, GERA, and UKBB<sup>b</sup> data, which were less similar to the 1KG reference genotypes, compared to the UKBB data, LDSC estimates were substantially biased whereas GREML estimates were close to the true value in estimation of SNP heritability ([Figure S10](#)). However, this result is well known and LDSC was not recommended for SNP heritability by the original authors,<sup>10</sup> but rather only for relative enrichment analysis. Despite this, LDSC is widely used for SNP-heritability estimation (because it is quick and simple). Thus, for completeness we include analyses for different scenarios to quantify the properties of the methods. When reducing the number of SNPs, estimated SNP heritabilities from LDSC were consistently unbiased; however, those from GREML were proportionally underestimated ([Figure S11](#)).

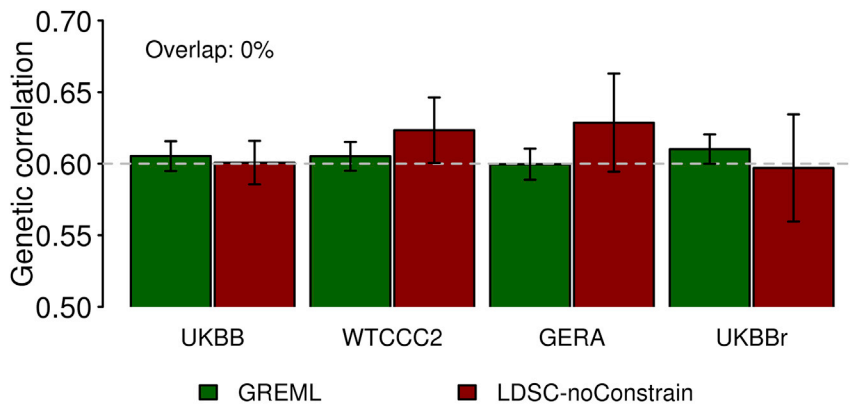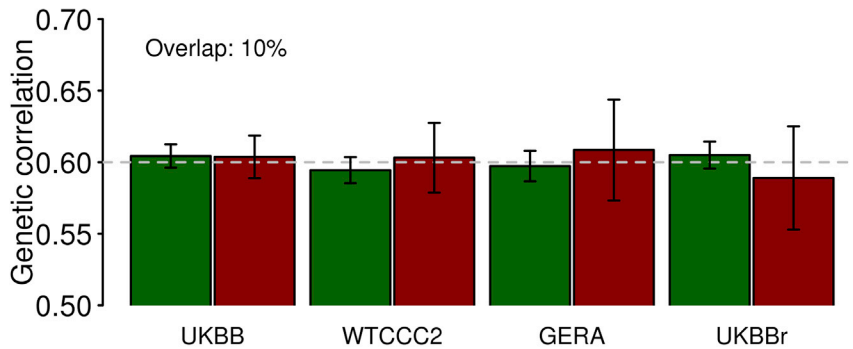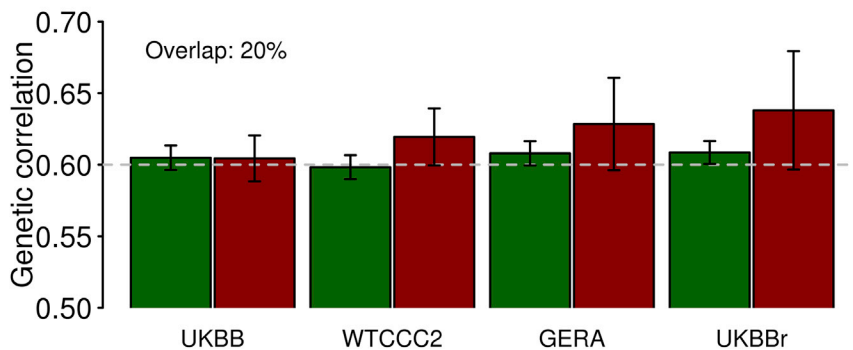

**Figure 2. Estimated Genetic Correlation with GREML and LDSC (without Constrain to the Intercept) Based on Different Genetic Datasets**

Simulation was based on 10,000 individuals that were randomly selected from UKBB, WTCCC2, GERA, and UKBBr (the raw genotype of UKBB), with 858K, 432K, 239K, and 124K SNPs, respectively. Bars are 95% CI based on 100 replicates. Overlap (0%, 10%, and 20%) stands for the percentage of overlapping individuals in the first and second traits. The gray dashed line stands for the true simulated genetic correlation 0.6.

many statistics for LDSC to see how much the SE of estimates could be reduced by increasing the number of samples and number of SNPs. For real data analyses, we obtained theoretical SE to assess the accuracy of the methods. GREML and LDSC estimates for the SNP heritability were 0.192 (SE 0.004) and 0.280 (SE 0.016) for SCZ and 0.184 (SE 0.004) and 0.255 (SE 0.014) for BMI. The notable difference between GREML and LDSC was probably because of a relatively small number of SNPs (500K) that might result in underestimated GREML SNP heritability (see Figure S11). This is one of the caveats of using GREML with real data that usually comprise multiple cohorts genotyped on different platforms, such that, even with imputation, the overlapping set of SNPs imputed with high confidence may be limited. The estimated genetic correlation for GREML and LDSC was  $-0.136$

(SE 0.017) and  $-0.173$  (SE 0.031). This indicated that the GREML estimate was 3.5 and 1.8 times more precise than LDSC estimates for the SNP heritability and genetic correlation, respectively. For LDSC, we also considered using additional GWAS summary statistics from publicly available resources.<sup>25,26</sup> The sample sizes used for additional LDSC analyses (LDSC-meta) are summarized in Table 3. The estimated SNP heritability was 0.259 (SE 0.019) for SCZ and 0.121 (SE 0.007) for BMI, and the estimated genetic correlation was  $-0.087$  (SE 0.019). Although sample size was increased 2.7-fold, the SE of LDSC estimate was not smaller than that for GREML estimate (SE = 0.017 versus 0.019, and p value =  $4.54E-15$  versus  $4.91E-06$  for GREML versus LDSC) (Table 3). It should be noted that GREML estimates used a homogeneous population (within UK and after stringent QC excluding population outliers) whereas LDSC-meta1 and -meta2 were based on

When using non-HapMap3 SNPs, LDSC estimates were consistently biased (Figure S12) and less accurate, compared to GREML estimates (Figures S13 and S14), which probably explains why LDSC is implemented using only HapMap3 SNPs. Although the genetic correlation is robust to such biasedness,<sup>4,11</sup> SNP heritability itself should be carefully interpreted for both GREML and LDSC. We also noted that LDSC and sLDSC estimates for SNP heritability were biased in the genome partitioning analysis (Figure S15) although the estimated enrichment was close to the true value when using sLDSC and in-sample LD scores (Figure S15).

We used real phenotype and individual genotype data from the Psychiatric Genomics Consortium (PGC) and UKBB to estimate genetic variance and covariance between SCZ and BMI using LDSC and GREML (Table 3 and Figure S16). We also used publicly available GWAS sum-

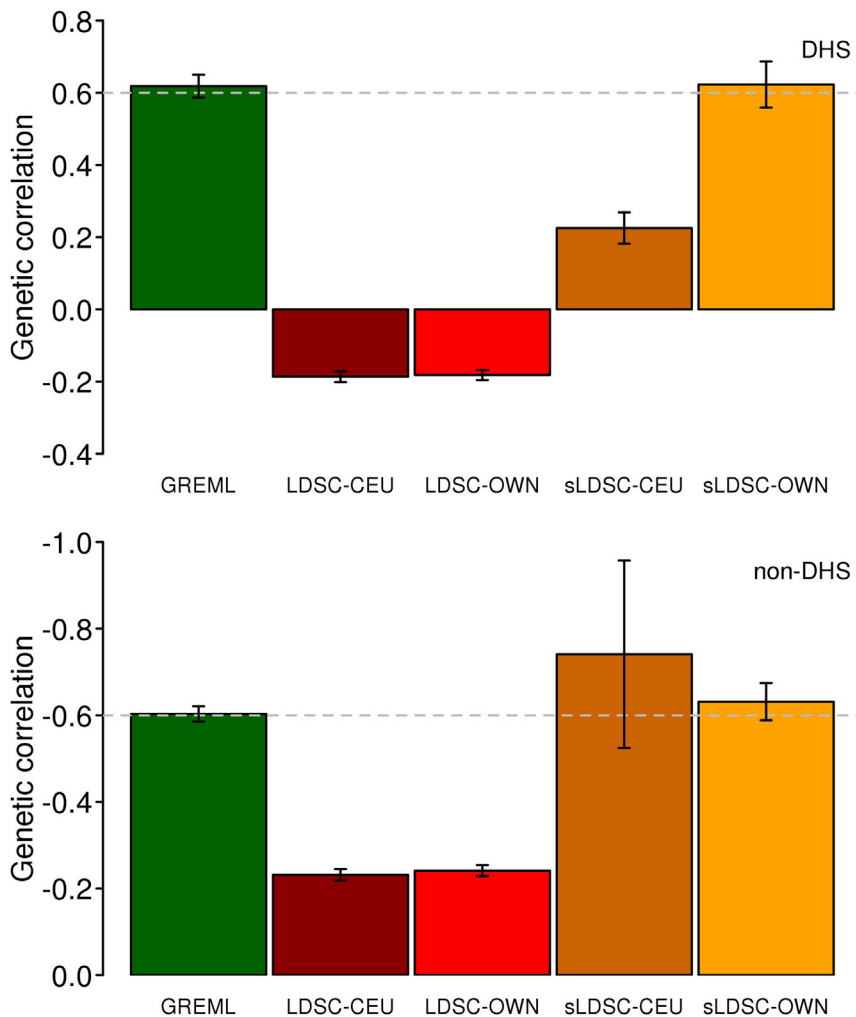

**Figure 3. Estimated Genetic Correlation of Simulated Data Based on a Genomic Partitioning Model**

Simulation was based on 10,000 individuals that were randomly selected from UKBB with 858K SNP. Based on Gusev et al.,<sup>24</sup> the 858K SNPs across the genome were stratified as two categories: DHS (194K SNPs with 2,268 causal SNPs) and non-DHS (664K SNPs with 7,732 causal SNPs). The genetic correlation for the simulated phenotypes between the first and second traits was 0.6 and -0.6 in DHS and non-DHS region, respectively. Bars are 95% CI based on 100 replicates. LDSC-CEU: Using LD-scores estimated from 1KG reference data. LDSC-OWN: Using LD-scores estimated from UKBB. sLDSC-CEU: Using stratified LD-scores estimated from 1KG reference data. sLDSC-OWN: Using stratified LD-scores estimated from UKBB. The presented results were based on 0% overlapping samples between the first and second traits and those based on other scenarios (e.g., 10% and 20%) are presented in Table S1.

and S20), and show that the estimates were similar between LDSC and GREML. However, GREML had a lower p value (0.0028 in Figure 4) than LDSC using LD scores from the 1KG reference data (p value = 0.04) or using LD scores from the in-sample data (p value = 0.007). We note that current sLDSC software does not provide a SE of estimated partitioned genetic correlation for each category;

combined meta-datasets consisting of ~80 different studies for which there is much more uncertainty about homogeneity than when using a single study cohort such as UKBB. The large difference of the estimates between LDSC and LDSC-meta1 (or -meta2) was probably due to the fact that heterogeneity among the 80 different studies resulted in underestimation of the common genetic variance and covariance, and that the difference of LD scores between the target and 1KG reference data would bias the LDSC estimates as shown in Figure S10. We also analyzed height data<sup>27</sup> and found a similar pattern in that GREML estimates were more accurate than LDSC estimates whether using the same data or using additional GWAS summary statistics for LDSC (Figure S17 and Table S2).

In the real data analyses, we carried out a functional category analysis partitioning the genome into regulatory, DHS, intronic, and intergenic regions using GREML (Figure 4 for SCZ/height and Figure S18 for SCZ/BMI). For SCZ and height, the genetic correlation for the regulatory region was negative and significantly different from 0 (p value = 0.0028; Figure 4). We also compared the results with the LDSC genetic correlation estimation (Figures S19

therefore, we did not attempt using the software for the real data analysis. For SNP-heritability estimation, the SE of the estimate for each category was much lower for GREML than sLDSC, ranging from 2.2- to 5.9-fold (Table S3).

LDSC and GREML are the methods that have been widely used in estimating genetic correlation, shedding light on the shared genetic architecture of complex traits, based on genome-wide SNPs. Two critical parameters for assessing methods are bias (whether the estimates over replicated analyses differ from the true value) and accuracy (reflected by the standard error of the estimate). Although the property of the accuracy of GREML has been thoroughly studied and tested,<sup>29,30</sup> that of LDSC has not been sufficiently investigated. In this report, we compare the accuracy of GREML and LDSC estimates based on various scenarios using simulated as well as real datasets, and draw simple but useful guidelines (Box 1).

Both GREML and LDSC are methods that aim to estimate the same genetic correlation parameter based on genetic variants across the allelic spectrum as defined earlier and the definition is invariant across the methods. The estimates from both GREML and LDSC are valid if all

**Table 3. Heritability and Genetic Correlation Based on Different Datasets**

| Method     | #SNPs     | Data              | # Individuals |          | h <sup>2</sup> BMI |          | h <sup>2</sup> SCZ (Liability Scale) |          | Genetic Correlation |          |          |
|------------|-----------|-------------------|---------------|----------|--------------------|----------|--------------------------------------|----------|---------------------|----------|----------|
|            |           |                   | Mean          | SD       | Estimate           | SE       | Estimate                             | SE       | Estimate            | SE       | p        |
| GREML      | 518,992   | UKBB+SCZ(qced)    | 152,961       | –        | 0.184              | 3.80E–03 | 0.192                                | 4.39E–03 | –0.136              | 1.74E–02 | 4.54E–15 |
| LDSC       | 516,519   | UKBB+SCZ(qced)    | 151,262       | 1,432.7  | 0.255              | 1.38E–02 | 0.280                                | 1.63E–02 | –0.173              | 3.08E–02 | 1.91E–08 |
| LDSC-meta1 | 477,163   | UKBB+GIANT+PGCSCZ | 422,499       | 20,226.0 | 0.111              | 8.10E–03 | 0.259                                | 1.28E–02 | –0.091              | 2.44E–02 | 1.95E–04 |
| LDSC-meta2 | 1,011,748 | UKBB+GIANT+PGCSCZ | 414,707       | 32,697.8 | 0.121              | 6.50E–03 | 0.261                                | 1.03E–02 | –0.087              | 1.90E–02 | 4.91E–06 |

GREML: Analysis was based on quality controlled genetic data for BMI (from UK Biobank with 111,019 individuals and 518,992 SNPs) and schizophrenia (from PGC with 41,630 individuals and 518,992 SNPs).

LDSC: The datasets used in LDSC were the same as in GREML.

LDSC-meta1: GWAS summary statistics for BMI were based on meta-analyzed GWAS results of UKBB individual-level genetic data (with 111,019 individuals and 518,992 SNPs) and of GIANT (245,051 individuals and 477,163 SNPs). For SCZ, the GWAS summary statistics from the full PGC sample based on 77,096 individuals were used.

LDSC-meta2: The datasets used in LDSC-meta2 were the same as in LDSC-meta1 except the increased number of SNPs (1,011,748) with which its performance was to check.

Mean and SD of #individuals: Due to different call rates of each SNP, number of individuals for each SNP used in GWAS were different.

required assumptions are met. GREML estimates variance/covariance components based on genetic covariance structure estimated from available (in-sample) individual genotypes, whereas LDSC estimates variance/covariance components based on association test statistics corrected for LD structure inferred from the markers in the reference panel (e.g., 1KG of the same ethnicity). The underlying assumption is that the samples generating the GWAS summary statistics are drawn from the same population as the samples generating the LDSC statistics, but here we showed that there can be LD-structure (LD-scores) differences between in-sample and reference data, which impacts parameter estimations (Tables 1 and 2 and Figure S10).

The reduced computing burden of LDSC over GREML makes it the method of choice for generating a quick overview of the genetic relationship between disorders (Table S4). However, our results suggest that important associations could be overlooked. For example, Bulik-Sullivan et al.<sup>11</sup> reported a negative genetic correlation between BMI and SCZ estimated by LDSC (estimate = –0.095, SE = 0.025 with p value = 1.75E–4), which was not significant after Bonferroni correction for the multiple testing. Because of the limited power from LDSC analysis, the shared genetic architecture between BMI and SCZ, perhaps, has had less attention than it is due. We confirmed the negative genetic correlation between BMI and SCZ with a greater confidence (estimate = –0.136, p value = 4.54E–15) using GREML. A second example is in analyses investigating the shared genetic architecture between height and SCZ, in which epidemiological evidence points to a negative association,<sup>31</sup> supported by genetic analyses.<sup>32</sup> However, there was no evidence of genetic correlation between height and SCZ in whole-genome level analyses of Bulik-Sullivan et al.<sup>11</sup> (estimate = –0.002, SE = 0.022). We used a GREML genomic partitioning analysis and found a significant negative genetic correlation between height and SCZ for the regulatory region (Figure 4). It was noted that the regulatory region was highly enriched for height (estimate = 0.094, p value = 7.60E–92 in Table S3), which

intuitively supports a significant genetic correlation with SCZ for the region. As shown in Figures 3 and S15, the GREML estimate was closer to the true values with a lower SE than LDSC or sLDSC estimate in simulated data. For the real data analyses (Table S3), GREML had more accurate SNP-heritability estimates (lower SE) than sLDSC. Moreover, the sum of each category matched well with the estimate of the whole genome for GREML whereas this was not the case for sLDSC (Tables S3).

Here we focused on genetic correlation estimates and did not consider a number of alternative approaches that have been explored in detail for estimation of SNP heritability, e.g., LDK approach,<sup>33</sup> weighted genomic relationship matrix,<sup>34</sup> MAF stratified,<sup>29</sup> and LD-MAF stratified approaches.<sup>35</sup> It was beyond the scope of our study to assess whether biasedness and accuracy can be improved with these methods, although a general observation is that biases in SNP-heritability estimation can “cancel” in estimates of genetic correlations, as biases impact both the numerator and denominator of the genetic correlation quotient.<sup>4,11</sup> We note that while under review, two new methods to estimate stratified genetic correlations via GWAS summary statistics<sup>36,37</sup> have been published as alternatives to sLDSC. Those approaches also need external reference samples to infer LD structure in the actual sample, implying the same problem as for LDSC (4 and 5 in Box 1). However, to partially address this problem, one method<sup>36</sup> achieves smaller standard errors than sLDSC through a block diagonalization of the LD matrix. A further study is needed to make explicit comparisons with GREML.

In conclusion, LDSC may be the best tool for a massive analysis of multiple sets of GWAS summary statistics in estimating genetic correlation between complex traits, because of its low computing burden and because summary statistics may be available for much larger sample sizes than those with individual genotype data. However, LDSC estimates should be carefully interpreted, considering the summary points (Box 1). Any interesting findings from LDSC analyses should be followed up, where

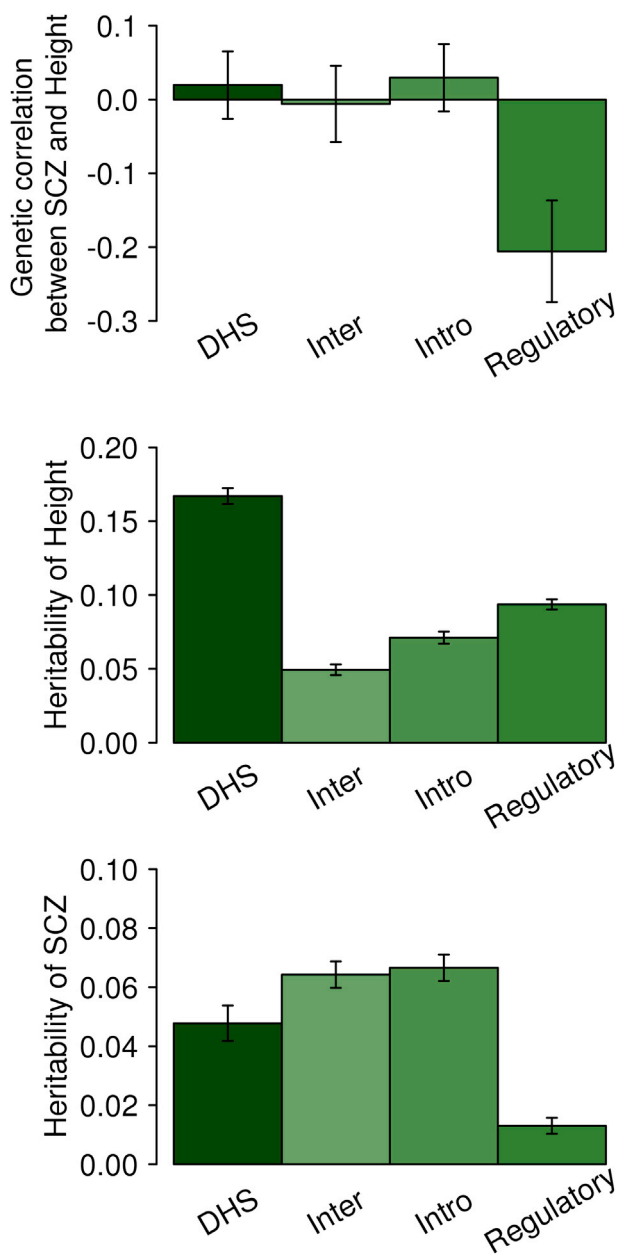

**Figure 4. Genetic Correlation between SCZ and Height and Heritability Based on SNPs in Partitioned Genomic Regions Estimated with GREML**

A joint model was applied by fitting four genomic relationship matrices simultaneously, each estimated based on the set of SNPs belong to each of the functional categories (regulatory, intron, intergene, and DHS). The bars are standard errors. *p* value for the estimate significantly different from 0 was 0.0028, 0.52, 0.91, and 0.67 for regulatory, intronic, intergenic, and DHS region, respectively.

possible, with more detailed analyses using individual genotype data and with GREML methods, even though sample sizes with individual genotype data may be smaller.

#### Supplemental Data

Supplemental Data include 23 figures, 4 tables, Supplemental Methods, and Consortia Members and Affiliations and can be

#### Consortia

The members of the Schizophrenia Working Group of the Psychiatric Genomics Consortium are Stephan Ripke, Benjamin M. Neale, Aiden Corvin, James T.R. Walters, Kai-How Farh, Peter A. Holmans, Phil Lee, Brendan Bulik-Sullivan, David A. Collier, Hailiang Huang, Tune H. Pers, Ingrid Agartz, Esben Agerbo, Margot Albus, Madeline Alexander, Farooq Amin, Silviu A. Bacanu, Martin Begemann, Richard A. Belliveau Jr, Judit Bene, Sarah E. Bergen, Elizabeth Bevilacqua, Tim B. Bigdeli, Donald W. Black, Richard Bruggeman, Nancy G. Buccola, Randy L. Buckner, William Byerley, Wiepke Cahn, Guiqing Cai, Dominique Champion, Rita M. Cantor, Vaughan J. Carr, Noa Carrera, Stanley V. Catts, Kimberly D. Chambert, Raymond C.K. Chan, Ronald Y.L. Chen, Eric Y. H. Chen, Wei Cheng, Eric F.C. Cheung, Siow Ann Chong, C. Robert Cloninger, David Cohen, Nadine Cohen, Paul Cormican, Nick Craddock, James J. Crowley, David Curtis, Michael Davidson, Kenneth L. Davis, Franziska Degenhardt, Jurgen Del Favero, Ditte Demontis, Dimitris Dikeos, Timothy Dinan, Srdjan Djurovic, Gary Donohoe, Elodie Drapeau, Jubao Duan, Frank Dudbridge, Naser Durmishi, Peter Eichhammer, Johan Eriksson, Valentina Escott-Price, Laurent Essioux, Ayman H. Fanous, Martialis S. Farrell, Josef Frank, Lude Franke, Robert Freedman, Nelson B. Freimer, Marion Friedl, Joseph I. Friedman, Menachem Fromer, Giulio Genovese, Lyudmila Georgieva, Ina Giegling, Paola Giusti-Rodríguez, Stephanie Godard, Jacqueline I. Goldstein, Vera Golimbet, Srihari Gopal, Jacob Gratten, Lieuwe de Haan, Christian Hammer, Marian L. Hamshere, Mark Hansen, Thomas Hansen, Vahram Haroutunian, Annette M. Hartmann, Frans A. Henskens, Stefan Herms, Joel N. Hirschhorn, Per Hoffmann, Andrea Hofman, Mads V. Hollegaard, David M. Hougaard, Masashi Ikeda, Inge Joa, Antonio Juliá, René S. Kahn, Luba Kalaydjieva, Sena Karachanak-Yankova, Juha Karjalainen, David Kavanagh, Matthew C. Keller, James L. Kennedy, Andrey Khrunin, Yunjung Kim, Janis Klovins, James A. Knowles, Bettina Konte, Vaidutis Kucinskas, Zita Ausrele Kucinskiene, Hana Kuzelova-Ptackova, Anna K. Kähler, Claudine Laurent, Jimmy Lee Chee Keong, Sophie E. Legge, Bernard Lerer, Miaoxin Li, Tao Li, Kung-Yee Liang, Jeffrey Lieberman, Svetlana Limborska, Carmel M. Loughland, Jan Lubinski, Jouko Lönnqvist, Milan Macek Jr, Patrik K.E. Magnusson, Brion S. Maher, Wolfgang Maier, Jacques Mallet, Sara Marsal, Manuel Mattheisen, Morten Mattingdsda, Robert W. McCarley, Colm McDonald, Andrew M. McIntosh, Sandra Meier, Carin J. Meijer, Bela Melegh, Ingrid Melle, Raquelle I. Mesholam-Gately, Andres Metspalu, Patricia T. Michie, Lili Milani, Vihra Milanova, Younes Mokrab, Derek W. Morris, Ole Mors, Kieran C. Murphy, Robin M. Murray, Inez Myin-Germeys, Bertram Müller-Myhsok, Mari Nelis, Igor Nenadic, Deborah A. Nertney, Gerald Nestadt, Kristin K. Nicodemus, Liene Nikitina-Zake, Laura Nisenbaum, Annelie Nordin, Eadbhard O'Callaghan, Colm O'Dushlaine, F. Anthony O'Neill, Sang-Yun Oh, Ann Olin, Line Olsen, Jim Van Os, Psychosis Endophenotypes International Consortium, Christos Pantelis, George N. Papadimitriou, Sergi Papio, Elena Parkhomenko, Michele T. Pato, Tiina Paunio, Milica Pejovic-Milovancevic, Diana O. Perkins, Olli Pietiläinen, Jonathan Pimm, Andrew J. Pocklington, John Powell, Alkes Price, Ann E. Pulver, Shaun M. Purcell, Digby Queded, Henrik B. Rasmussen, Abraham Reichenberg, Mark A. Reimers, Alexander L. Richards, Joshua L. Roffman, Panos Roussos, Douglas M. Ruderfer, Veikko Salomaa, Alan R. Sanders,

## Box 1. Summary Points

1. GREML and LDSC can both provide unbiased estimates of the genetic correlation between two traits. GREML requires individual-level genotype data, while LDSC requires only association summary statistics and LD scores per SNP. If LD scores have been calculated from the same sample as the association statistics, then GREML and LDSC provide similar estimates of the genetic correlation. However, in practice LD scores are estimated from external reference samples of the same broad ethnicity, which can lead to bias in the estimates (Figures S21 and S22). As a rule of thumb, when LDSC and GREML estimates are dissimilar, we recommend reporting the estimate with a lower SE. The theoretical SE of the estimates is a reliable indicator to determine the better estimator, which agrees well with the empirical SE (from simulation replicates) (Figure S23).
2. When combining multiple data sets to estimate genetic correlations between multiple traits, it is possible, in practice, that the number of SNPs remaining after QC is relatively small. When the number of available SNPs is small, the SE of LDSC estimates for genetic correlation can be increased relatively more, compared to that of GREML estimates (Figure S2).
3. SNP heritability has a different property, compared to genetic correlation since the latter is robust to biased estimation of genetic variance and covariance (presumably the biases occur in the numerator and denominator and hence approximately cancel out).<sup>4,11</sup> Especially when using a small number of SNPs (<500K) for GREML or when using multiple meta-data sets for LDSC, estimated SNP heritability itself should be reported with caution as both methods can give biased estimates.
4. When using a study cohort, it is desirable to measure heterogeneity between the cohort and 1KG reference data (e.g., measuring the correlation between LD scores estimated based on the cohort and 1KG reference data as in Table 1). If the correlation is not close to 1, LDSC estimates should be carefully interpreted. We recommend that when GWAS summary statistics are provided, cohort-specific LD scores are provided also. It is also warranted that an optimal approach to meta-analyze LD scores across multiple cohorts should be developed to improve LDSC performance.<sup>28</sup>
5. When using extensive metadata that possibly include heterogeneous sources, there are two problems. Firstly, the LD scores estimated from reference samples such as 1KG reference may be a poor representation of the LD scores of the heterogeneous metadata, such that the accuracy of LDSC decreases. Second, the distribution of causal variants and pleiotropic effects may be different between heterogeneous sources such that the estimates can be biased (capturing only common effects between heterogeneous sources). This implies that LDSC estimates should be reported with caution when using extensive metadata sets (Table 3).
6. One of advantages of having access to individual-level genotype data comes when more detailed analyses are required, such as genomic partitioning analyses. As shown in Figure 4, a GREML genomic partitioning analysis reveals a significant negative genetic correlation between SCZ and height for the regulatory region, which genome-wide GREML or LDSC approach has less power to detect.

Ulrich Schall, Christian R. Schubert, Thomas G. Schulze, Sibylle G. Schwab, Edward M. Scolnick, Rodney J. Scott, Larry J. Seidman, Jianxin Shi, Engilbert Sigurdsson, Teimuraz Silagadze, Jeremy M. Silverman, Kang Sim, Petr Slominsky, Jordan W. Smoller, Hon-Cheong So, Chris C.A. Spencer, Eli A. Stah, Hreinn Stefansson, Stacy Steinberg, Elisabeth Stogmann, Richard E. Straub, Eric Strengman, Jana Strohmaier, T. Scott Stroup, Mythily Subramaniam, Jaana Suvisaari, Dragan M. Svrakic, Jin P. Szatkiewicz, Erik Söderman, Srinivas Thirumalai, Draga Toncheva, Sarah Tosato, Juha Veijola, John Waddington, Dermot Walsh, Dai Wang, Qiang Wang, Bradley T. Webb, Mark Weiser, Dieter B. Wildenauer, Nigel M. Williams, Stephanie Williams, Stephanie H. Witt, Aaron R. Wolen, Emily H.M. Wong, Brandon K. Wormley, Hualin Simon Xi, Clement C. Zai, Xuebin Zheng, Fritz Zimprich, Kari Stefansson, Peter M. Visscher, Wellcome Trust Case-Control Consortium, Rolf Adolfsson, Ole A. Andreassen, Douglas H.R. Blackwood, Elvira Bramon, Joseph D. Buxbaum, Anders D. Børghlum, Sven Cichon, Ariel Darvasi, Enrico Domenici, Hannelore Ehrenreich, Tõnu Esko, Pablo V. Gejman, Michael Gill, Hugh Gurling, Christina M. Hultman, Nakao Iwata, Assen V. Jablensky, Erik G. Jönsson, Kenneth

S. Kendler, George Kirov, Jo Knight, Todd Lencz, Douglas F. Levinson, Qingqin S. Li, Jianjun Liu, Anil K. Malhotra, Steven A. McCauley, Andrew McQuillin, Jennifer L. Moran, Preben B. Mortensen, Bryan J. Mowry, Markus M. Nöthen, Roel A. Ophoff, Michael J. Owen, Aarno Palotie, Carlos N. Pato, Tracey L. Petryshen, Danielle Posthuma, Marcella Rietsche, Brien P. Riley, Dan Rujescu, Pak C. Sham, Pamela Sklar, David St Clair, Daniel R. Weinberger, Jens R. Wendland, Thomas Werge, Mark J. Daly, Patrick F. Sullivan, and Michael C. O'Donovan.

## Acknowledgments

This research is supported by the Australian National Health and Medical Research Council (1080157, 1087889) and the Australian Research Council (DP160102126, FT160100229). This research has been conducted using the UK Biobank Resource. UK Biobank Research Ethics Committee (REC) approval number is 11/NW/0382. Our reference number approved by UK Biobank is 14575. GERA data came from a grant, the Resource for Genetic



Epidemiology Research in Adult Health and Aging (RC2 AG033067; Schaefer and Risch, PIs) awarded to the Kaiser Permanente Research Program on Genes, Environment, and Health (RPGEH) and the UCSF Institute for Human Genetics. The RPGEH was supported by grants from the Robert Wood Johnson Foundation, the Wayne and Gladys Valley Foundation, the Ellison Medical Foundation, Kaiser Permanente Northern California, and the Kaiser Permanente National and Northern California Community Benefit Programs. The RPGEH and the Resource for Genetic Epidemiology Research in Adult Health and Aging are described in the GERA website (see [Web Resources](#)). This study makes use of data generated by the Wellcome Trust Case-Control Consortium. A full list of the investigators who contributed to the generation of the WTCCC data is available online. Funding for the WTCCC project was provided by the Wellcome Trust under awards 076113, 085475, and 090355.

Received: October 4, 2017

Accepted: March 20, 2018

Published: May 10, 2018

### Web Resources

GERA, [https://www.ncbi.nlm.nih.gov/projects/gap/cgi-bin/study.cgi?study\\_id=phs000674.v2.p2](https://www.ncbi.nlm.nih.gov/projects/gap/cgi-bin/study.cgi?study_id=phs000674.v2.p2)

GIANT GWAS results, [https://portals.broadinstitute.org/collaboration/giant/index.php/GIANT\\_consortium\\_data\\_files](https://portals.broadinstitute.org/collaboration/giant/index.php/GIANT_consortium_data_files)

LD scores, <https://data.broadinstitute.org/alkesgroup/LDSCORE/LDSC>, <https://github.com/bulik/ldsc>

MTG2, <https://sites.google.com/site/honglee0707/mtg2>

Psychiatric Genomics Consortium, <http://www.med.unc.edu/pgc/>

UK Biobank, <http://www.ukbiobank.ac.uk>

WTCCC2, <http://www.wtccc.org.uk/cc2>

### References

1. Mehta, D., Tropf, F.C., Gratten, J., Bakshi, A., Zhu, Z., Bacanu, S.-A., Hemani, G., Magnusson, P.K.E., Barban, N., Esko, T., et al.; Schizophrenia Working Group of the Psychiatric Genomics Consortium, LifeLines Cohort Study, and TwinsUK (2016). Evidence for genetic overlap between schizophrenia and age at first birth in women. *JAMA Psychiatry* 73, 497–505.
2. Lee, S.H., Byrne, E.M., Hultman, C.M., Kähler, A., Vinkhuyzen, A.A.E., Ripke, S., Andreassen, O.A., Frisell, T., Gusev, A., Hu, X., et al.; Schizophrenia Working Group of the Psychiatric Genomics Consortium and Rheumatoid Arthritis Consortium International; Schizophrenia Working Group of the Psychiatric Genomics Consortium Authors; Schizophrenia Working Group of the Psychiatric Genomics Consortium Collaborators; Rheumatoid Arthritis Consortium International Authors; and Rheumatoid Arthritis Consortium International Collaborators (2015). New data and an old puzzle: the negative association between schizophrenia and rheumatoid arthritis. *Int. J. Epidemiol.* 44, 1706–1721.
3. Lee, S.H., DeCandia, T.R., Ripke, S., Yang, J., Sullivan, P.F., Goddard, M.E., Keller, M.C., Visscher, P.M., Wray, N.R.; Schizophrenia Psychiatric Genome-Wide Association Study Consortium (PGC-SCZ); International Schizophrenia Consortium (ISC); and Molecular Genetics of Schizophrenia Collaboration (MGS) (2012). Estimating the proportion of variation in susceptibility to schizophrenia captured by common SNPs. *Nat. Genet.* 44, 247–250.
4. Lee, S.H., Yang, J., Goddard, M.E., Visscher, P.M., and Wray, N.R. (2012). Estimation of pleiotropy between complex diseases using single-nucleotide polymorphism-derived genomic relationships and restricted maximum likelihood. *Bioinformatics* 28, 2540–2542.
5. Harville, D.A. (1977). Maximum likelihood approaches to variance component estimation and to related problems. *J. Am. Stat. Assoc.* 72, 320–338.
6. Patterson, H.D., and Thompson, R. (1971). Recovery of interblock information when block sizes are unequal. *Biometrika* 58, 545–554.
7. Neale, M., and Cardon, L. (2013). *Methodology for Genetic Studies of Twins and Families* (Springer Science & Business Media).
8. VanRaden, P.M. (2008). Efficient methods to compute genomic predictions. *J. Dairy Sci.* 91, 4414–4423.
9. Yang, J., Lee, S.H., Goddard, M.E., and Visscher, P.M. (2011). GCTA: a tool for genome-wide complex trait analysis. *Am. J. Hum. Genet.* 88, 76–82.
10. Bulik-Sullivan, B.K., Loh, P.R., Finucane, H.K., Ripke, S., Yang, J., Patterson, N., Daly, M.J., Price, A.L., Neale, B.M.; and Schizophrenia Working Group of the Psychiatric Genomics Consortium (2015). LD Score regression distinguishes confounding from polygenicity in genome-wide association studies. *Nat. Genet.* 47, 291–295.
11. Bulik-Sullivan, B., Finucane, H.K., Anttila, V., Gusev, A., Day, F.R., Loh, P.R., Duncan, L., Perry, J.R., Patterson, N., Robinson, E.B., et al.; ReproGen Consortium; Psychiatric Genomics Consortium; and Genetic Consortium for Anorexia Nervosa of the Wellcome Trust Case Control Consortium 3 (2015). An atlas of genetic correlations across human diseases and traits. *Nat. Genet.* 47, 1236–1241.
12. Zheng, J., Erzurumluoglu, A.M., Elsworth, B.L., Kemp, J.P., Howe, L., Haycock, P.C., Hemani, G., Tansey, K., Laurin, C., Pourcain, B.S., et al.; Early Genetics and Lifecourse Epidemiology (EAGLE) Eczema Consortium (2017). LD Hub: a centralized database and web interface to perform LD score regression that maximizes the potential of summary level GWAS data for SNP heritability and genetic correlation analysis. *Bioinformatics* 33, 272–279.
13. Finucane, H.K., Bulik-Sullivan, B., Gusev, A., Trynka, G., Reshef, Y., Loh, P.R., Anttila, V., Xu, H., Zang, C., Farh, K., et al.; ReproGen Consortium; Schizophrenia Working Group of the Psychiatric Genomics Consortium; and RACI Consortium (2015). Partitioning heritability by functional annotation using genome-wide association summary statistics. *Nat. Genet.* 47, 1228–1235.
14. Lee, S.H., and van der Werf, J.H. (2016). MTG2: an efficient algorithm for multivariate linear mixed model analysis based on genomic information. *Bioinformatics* 32, 1420–1422.
15. Maier, R., Moser, G., Chen, G.-B., Ripke, S., Coryell, W., Potash, J.B., Scheftner, W.A., Shi, J., Weissman, M.M., Hultman, C.M., et al.; Cross-Disorder Working Group of the Psychiatric Genomics Consortium (2015). Joint analysis of psychiatric disorders increases accuracy of risk prediction for schizophrenia, bipolar disorder, and major depressive disorder. *Am. J. Hum. Genet.* 96, 283–294.
16. Collins, R. (2012). What makes UK Biobank special? *Lancet* 379, 1173–1174.

17. Lynch, M., and Walsh, B. (1998). *Genetics and Analysis of Quantitative Traits* (MA: Sinauer Sunderland).
18. Sawcer, S., Hellenthal, G., Pirinen, M., Spencer, C.C., Patsopoulos, N.A., Moutsianas, L., Dilthey, A., Su, Z., Freeman, C., Hunt, S.E., et al.; International Multiple Sclerosis Genetics Consortium; and Wellcome Trust Case Control Consortium 2 (2011). Genetic risk and a primary role for cell-mediated immune mechanisms in multiple sclerosis. *Nature* *476*, 214–219.
19. Mells, G.F., Floyd, J.A.B., Morley, K.I., Cordell, H.J., Franklin, C.S., Shin, S.-Y., Heneghan, M.A., Neuberger, J.M., Donaldson, P.T., Day, D.B., et al.; UK PBC Consortium; and Wellcome Trust Case Control Consortium 3 (2011). Genome-wide association study identifies 12 new susceptibility loci for primary biliary cirrhosis. *Nat. Genet.* *43*, 329–332.
20. Bellenguez, C., Bevan, S., Gschwendtner, A., Spencer, C.C., Burgess, A.I., Pirinen, M., Jackson, C.A., Traylor, M., Strange, A., Su, Z., et al.; International Stroke Genetics Consortium (ISGC); and Wellcome Trust Case Control Consortium 2 (WTCCC2) (2012). Genome-wide association study identifies a variant in HDAC9 associated with large vessel ischemic stroke. *Nat. Genet.* *44*, 328–333.
21. Tsoi, L.C., Spain, S.L., Knight, J., Ellinghaus, E., Stuart, P.E., Capon, F., Ding, J., Li, Y., Tejasvi, T., Gudjonsson, J.E., et al.; Collaborative Association Study of Psoriasis (CASP); Genetic Analysis of Psoriasis Consortium; Psoriasis Association Genetics Extension; and Wellcome Trust Case Control Consortium 2 (2012). Identification of 15 new psoriasis susceptibility loci highlights the role of innate immunity. *Nat. Genet.* *44*, 1341–1348.
22. Banda, Y., Kvale, M.N., Hoffmann, T.J., Hesselson, S.E., Ranatunga, D., Tang, H., Sabatti, C., Croen, L.A., Dispensa, B.P., Henderson, M., et al. (2015). Characterizing race/ethnicity and genetic ancestry for 100,000 subjects in the genetic epidemiology research on adult health and aging (GERA) cohort. *Genetics* *200*, 1285–1295.
23. Lee, S.H., Weerasinghe, W.M.S.P., Wray, N.R., Goddard, M.E., and van der Werf, J.H.J. (2017). Using information of relatives in genomic prediction to apply effective stratified medicine. *Sci. Rep.* *7*, 42091.
24. Gusev, A., Lee, S.H., Trynka, G., Finucane, H., Vilhjálmsdóttir, B.J., Xu, H., Zang, C., Ripke, S., Bulik-Sullivan, B., Stahl, E., et al.; Schizophrenia Working Group of the Psychiatric Genomics Consortium; SWE-SCZ Consortium; Schizophrenia Working Group of the Psychiatric Genomics Consortium; and SWE-SCZ Consortium (2014). Partitioning heritability of regulatory and cell-type-specific variants across 11 common diseases. *Am. J. Hum. Genet.* *95*, 535–552.
25. Schizophrenia Working Group of the Psychiatric Genomics Consortium (2014). Biological insights from 108 schizophrenia-associated genetic loci. *Nature* *511*, 421–427.
26. Locke, A.E., Kahali, B., Berndt, S.I., Justice, A.E., Pers, T.H., Day, F.R., Powell, C., Vedantam, S., Buchkovich, M.L., Yang, J., et al.; LifeLines Cohort Study; ADIPOGen Consortium; AGEN-BMI Working Group; CARDIOGRAMplusC4D Consortium; CKDGen Consortium; GLGC; ICBP; MAGIC Investigators; MuTHER Consortium; MIGen Consortium; PAGE Consortium; ReproGen Consortium; GENIE Consortium; and International Endogene Consortium (2015). Genetic studies of body mass index yield new insights for obesity biology. *Nature* *518*, 197–206.
27. Wood, A.R., Esko, T., Yang, J., Vedantam, S., Pers, T.H., Gustafsson, S., Chu, A.Y., Estrada, K., Luan, J., Kutalik, Z., et al.; Electronic Medical Records and Genomics (eMEMERGE) Consortium; MIGen Consortium; PAGE Consortium; and LifeLines Cohort Study (2014). Defining the role of common variation in the genomic and biological architecture of adult human height. *Nat. Genet.* *46*, 1173–1186.
28. Pasaniuc, B., and Price, A.L. (2017). Dissecting the genetics of complex traits using summary association statistics. *Nat. Rev. Genet.* *18*, 117–127.
29. Lee, S.H., Yang, J., Chen, G.B., Ripke, S., Stahl, E.A., Hultman, C.M., Sklar, P., Visscher, P.M., Sullivan, P.F., Goddard, M.E., and Wray, N.R. (2013). Estimation of SNP heritability from dense genotype data. *Am. J. Hum. Genet.* *93*, 1151–1155.
30. Speed, D., Hemani, G., Johnson, M.R., and Balding, D.J. (2012). Improved heritability estimation from genome-wide SNPs. *Am. J. Hum. Genet.* *91*, 1011–1021.
31. Gunnell, D., Harrison, G., Whitley, E., Lewis, G., Tynelius, P., and Rasmussen, F. (2005). The association of fetal and childhood growth with risk of schizophrenia. Cohort study of 720,000 Swedish men and women. *Schizophr. Res.* *79*, 315–322.
32. Bacanu, S.A., Chen, X., and Kendler, K.S. (2013). The genetic overlap between schizophrenia and height. *Schizophr. Res.* *151*, 226–228.
33. Speed, D., Cai, N., Johnson, M.R., Nejentsev, S., Balding, D.J.; and UCLEB Consortium (2017). Reevaluation of SNP heritability in complex human traits. *Nat. Genet.* *49*, 986–992.
34. de Los Campos, G., Vazquez, A.I., Fernando, R., Klimentidis, Y.C., and Sorensen, D. (2013). Prediction of complex human traits using the genomic best linear unbiased predictor. *PLoS Genet.* *9*, e1003608–e1003608.
35. Yang, J., Bakshi, A., Zhu, Z., Hemani, G., Vinkhuyzen, A.A.E., Lee, S.H., Robinson, M.R., Perry, J.R.B., Nolte, I.M., van Vliet-Ostaptchouk, J.V., et al.; LifeLines Cohort Study (2015). Genetic variance estimation with imputed variants finds negligible missing heritability for human height and body mass index. *Nat. Genet.* *47*, 1114–1120.
36. Shi, H., Mancuso, N., Spendlove, S., and Pasaniuc, B. (2017). Local genetic correlation gives insights into the shared genetic architecture of complex traits. *Am. J. Hum. Genet.* *101*, 737–751.
37. Lu, Q., Li, B., Ou, D., Erlendsdóttir, M., Powles, R.L., Jiang, T., Hu, Y., Chang, D., Jin, C., Dai, W., et al. (2017). A powerful approach to estimating annotation-stratified genetic covariance via GWAS summary statistics. *Am. J. Hum. Genet.* *101*, 939–964.

**The American Journal of Human Genetics, Volume 102**

**Supplemental Data**

**Estimation of Genetic Correlation via Linkage**

**Disequilibrium Score Regression**

**and Genomic Restricted Maximum Likelihood**

**Guiyan Ni, Gerhard Moser, Schizophrenia Working Group of the Psychiatric Genomics Consortium, Naomi R. Wray, and S. Hong Lee**

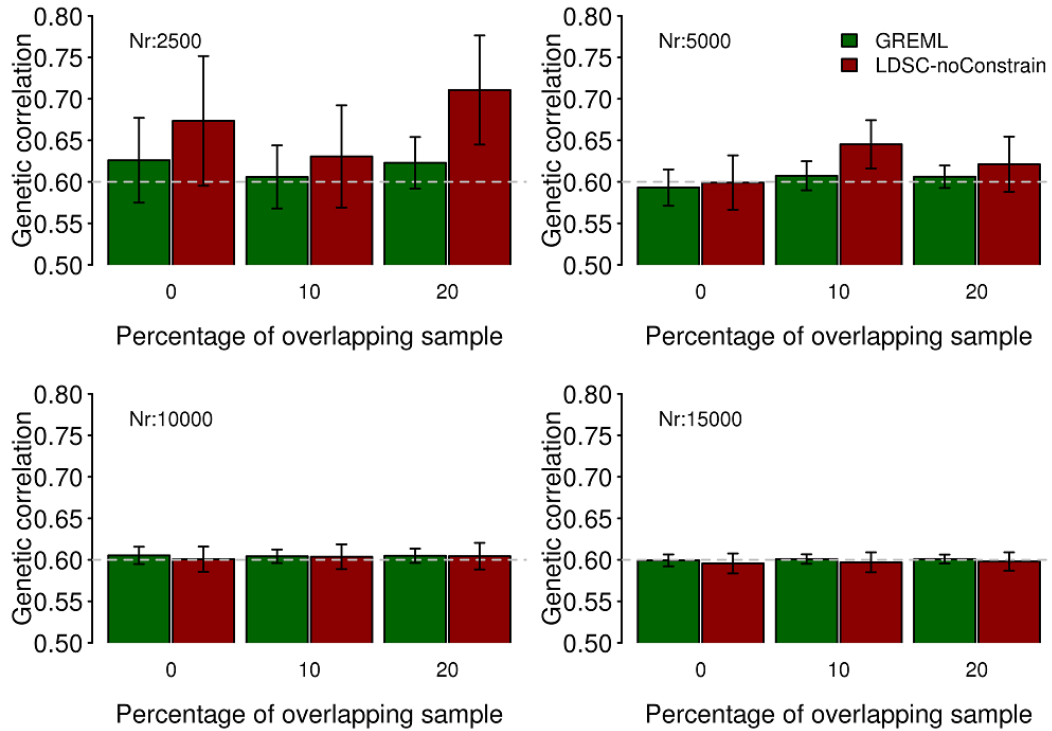

**Figure S1. Estimated genetic correlation from GREML and LDSC (without constraining the intercept) in different simulation scenarios based on UK Biobank data.**

The x-axis labels of 0, 10 or 20 are the percentage of overlapping individuals between the first and second traits. Nr: The number of available phenotype records in each trait. The horizontal lines stand for the simulated true genetic correlation (0.6). The error bars are 95% CI obtained from 100 replications.

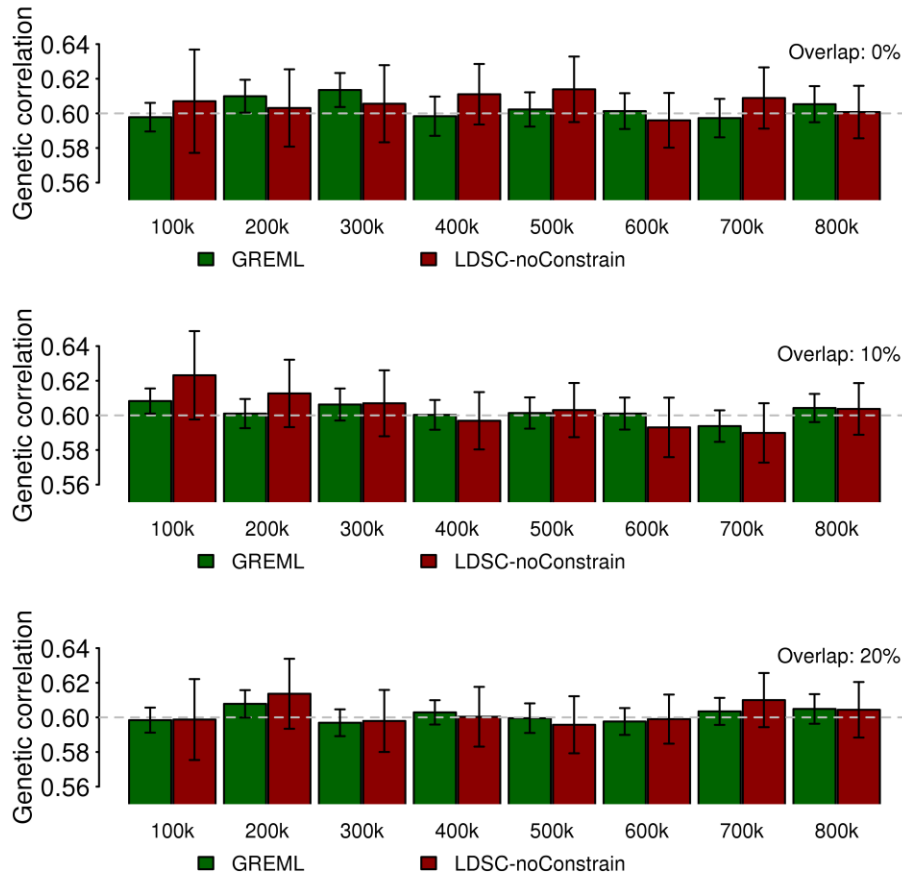

**Figure S2. Estimated genetic correlation using simulated phenotypes based on UK Biobank genotypes.**

Bars are 95% CI based on 100 replicates. The grey dashed line stands for the true simulated genetic correlation 0.6. This result was based on 858K SNPs (after QC) and 10,000 individuals that were randomly selected from the UK Biobank. SNPs in each bin were randomly and independently drawn from the 858k SNPs. The number of causal SNPs was 10,000 that were randomly selected in each bin. The true simulated value for the genetic correlation was 0.6 and that for the heritability was 0.5 for both traits. Overlap (0%, 10% and 20%) stands for the percentage of overlapping individuals in the first and second traits.

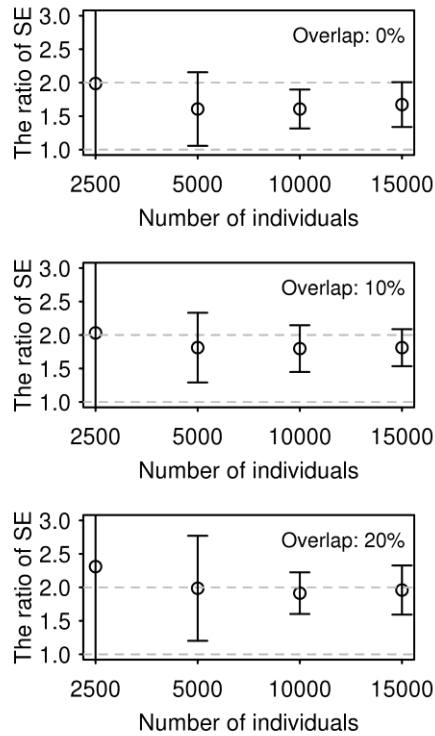

**Figure S3. The ratio of SE of LDSC estimate to that of GREML estimate using simulated phenotypes based on UK Biobank genotypes.**

Bars are 95% CI based on 100 replicates. The x-axis shows the number of individuals in each trait. Out of 858,991 SNPs, 10,000 SNPs were randomly selected as causal variants. Overlap (0%, 10% and 20%) stands for the percentage of overlapping individuals in the first and second traits. The horizontal dashed lines are the ratios of SE at 1 and 2.

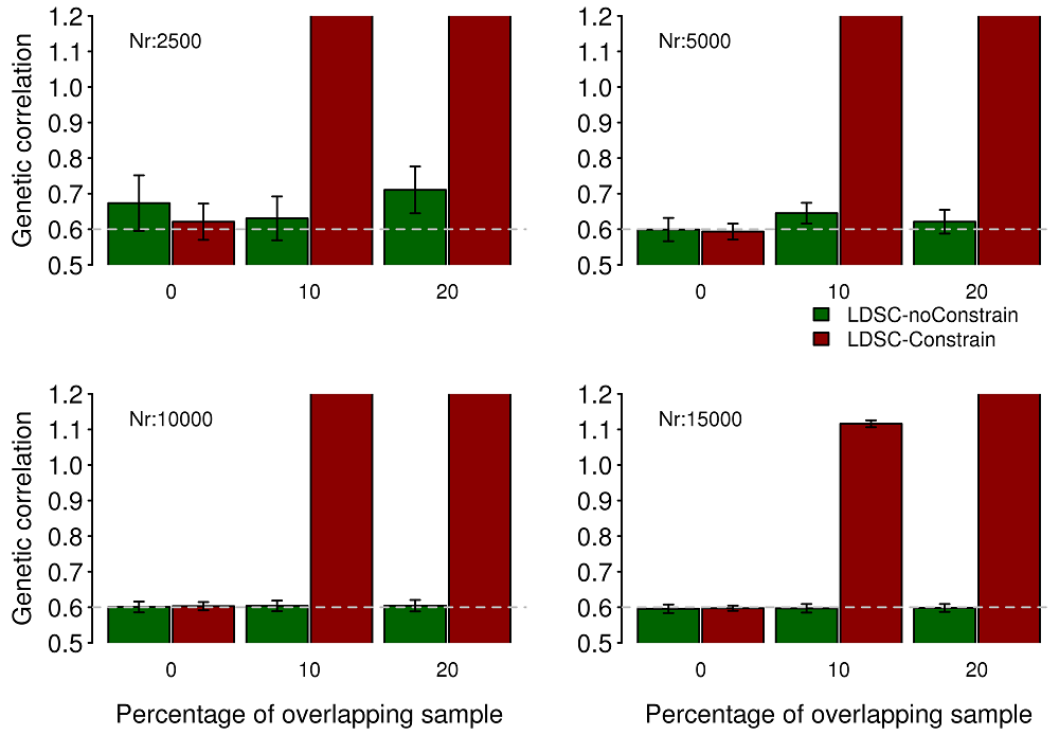

**Figure S4. Estimated genetic correlation based on LDSC with or without intercept constrained to zero.**

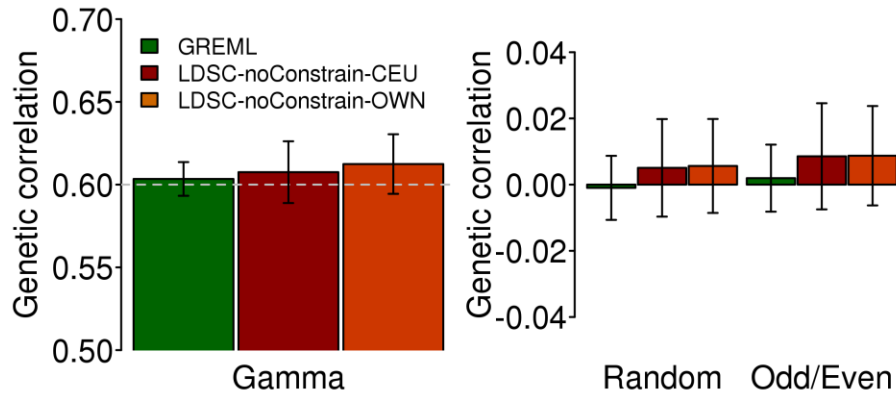

**Figure S5. Genetic correlation of GREML and LDSC based on different simulated genetic architectures.**

Gamma: the same simulation except that SNP effects were drawn from a multivariate gamma distribution with a shape parameter of one. Random: two sets of non-overlapped SNPs (N=10,000) were randomly selected and each set was assigned as causal SNPs to each trait (SNP effects were generated from a multivariate normal distribution). Odd/Even: two sets of SNPs were randomly selected such that one set was strictly selected from odd and the other set was selected from even number of chromosomes, and each set was assigned as causal SNPs to each trait (SNP effects were generated from a multivariate normal distribution).



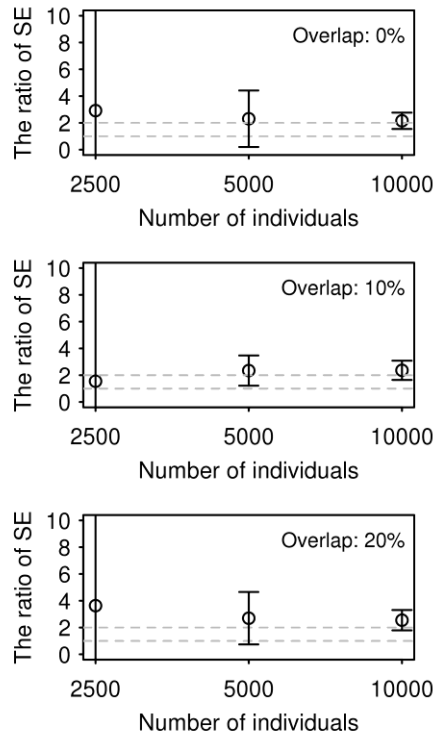

**Figure S6. The ratio of SE of LDSC estimate to that of GREML estimate using simulated phenotypes based on WTCCC2 genotypes.**

Bars are 95% CI based on 100 replicates. The x-axis shows the number of individuals in each trait. The total sample size of WTCCC2 was 20,659; therefore, the maximum number of individuals for each trait for the analyses was 10,000. Overlap (0%, 10% and 20%) stands for the percentage of overlapping individuals in the first and second traits. The horizontal dashed lines are the ratios of SE at 1 and 2.

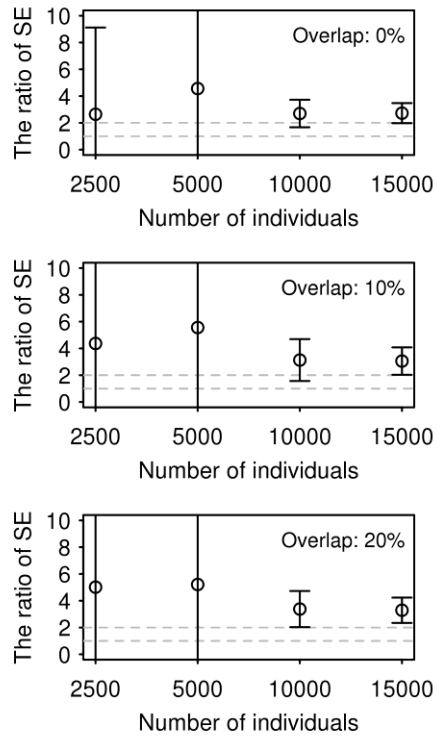

**Figure S7. The ratio of SE of LDSC estimate to that of GREML estimate using simulated phenotypes based on GERA genotypes.**

Bars are 95% CI based on 100 replicates. The x-axis shows the number of individuals in each trait. Overlap (0%, 10% and 20%) stands for the percentage of overlapping individuals in the first and second traits. The horizontal dashed lines are the ratios of SE at 1 and 2.

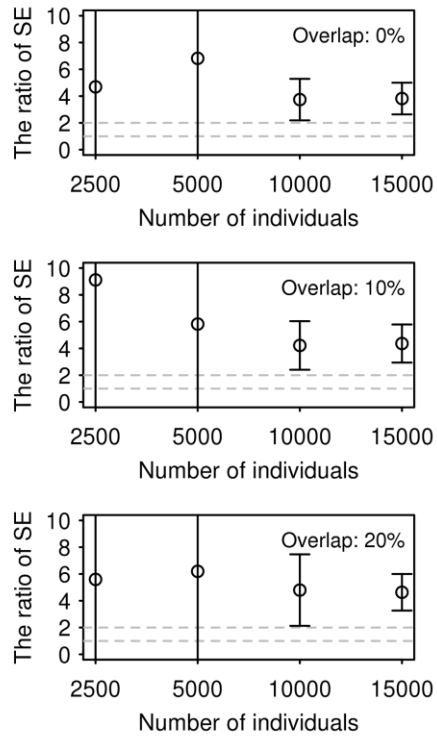

**Figure S8. The ratio of SE of LDSC estimate to that of GREML estimate using simulated phenotypes based on raw genotype data of the UK Biobank.**

Bars are 95% CI based on 100 replicates. The x-axis shows the number of individuals in each trait. Overlap (0%, 10% and 20%) stands for the percentage of overlapping individuals in the first and second traits. The horizontal dashed lines are the ratios of SE at 1 and 2.

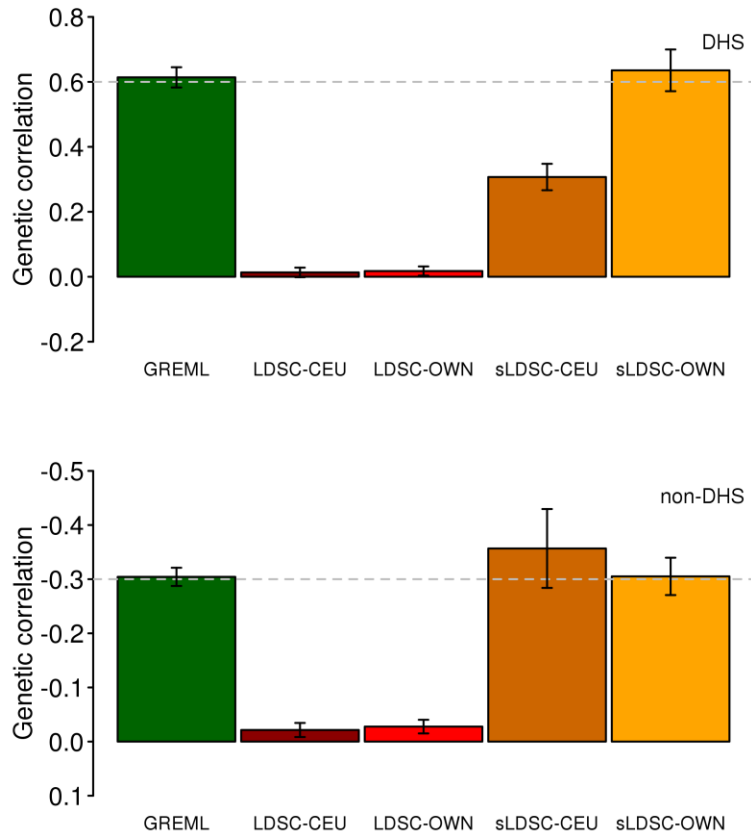

**Figure S9 Estimated genetic correlation of simulated data based on a genomic partitioning model.**

Simulation was based on 10,000 individuals that were randomly selected from UKBB with 858K SNP. Based on Gusev et al.<sup>1</sup>, the 858K SNPs across the genome were stratified as two categories: DHS (194K SNPs with 2268 causal SNPs) and non-DHS (664K SNPs with 7732 causal SNPs). The genetic correlation for the simulated phenotypes between the first and second traits was 0.6 and -0.3 in DHS and non-DHS region, respectively. Bars are 95% CI based on 100 replicates. LDSC-CEU: Using LD-scores estimated from 1KG reference data. LDSC-OWN: Using LD-scores estimated from UKBB. sLDSC-CEU: Using stratified LD-scores estimated from 1KG reference data. sLDSC-OWN: Using stratified LD-scores estimated from UKBB. The presented results were based on 0% overlapping samples between the first and second traits and those based on other scenarios (e.g. 10% and 20%) are presented in Table S1.

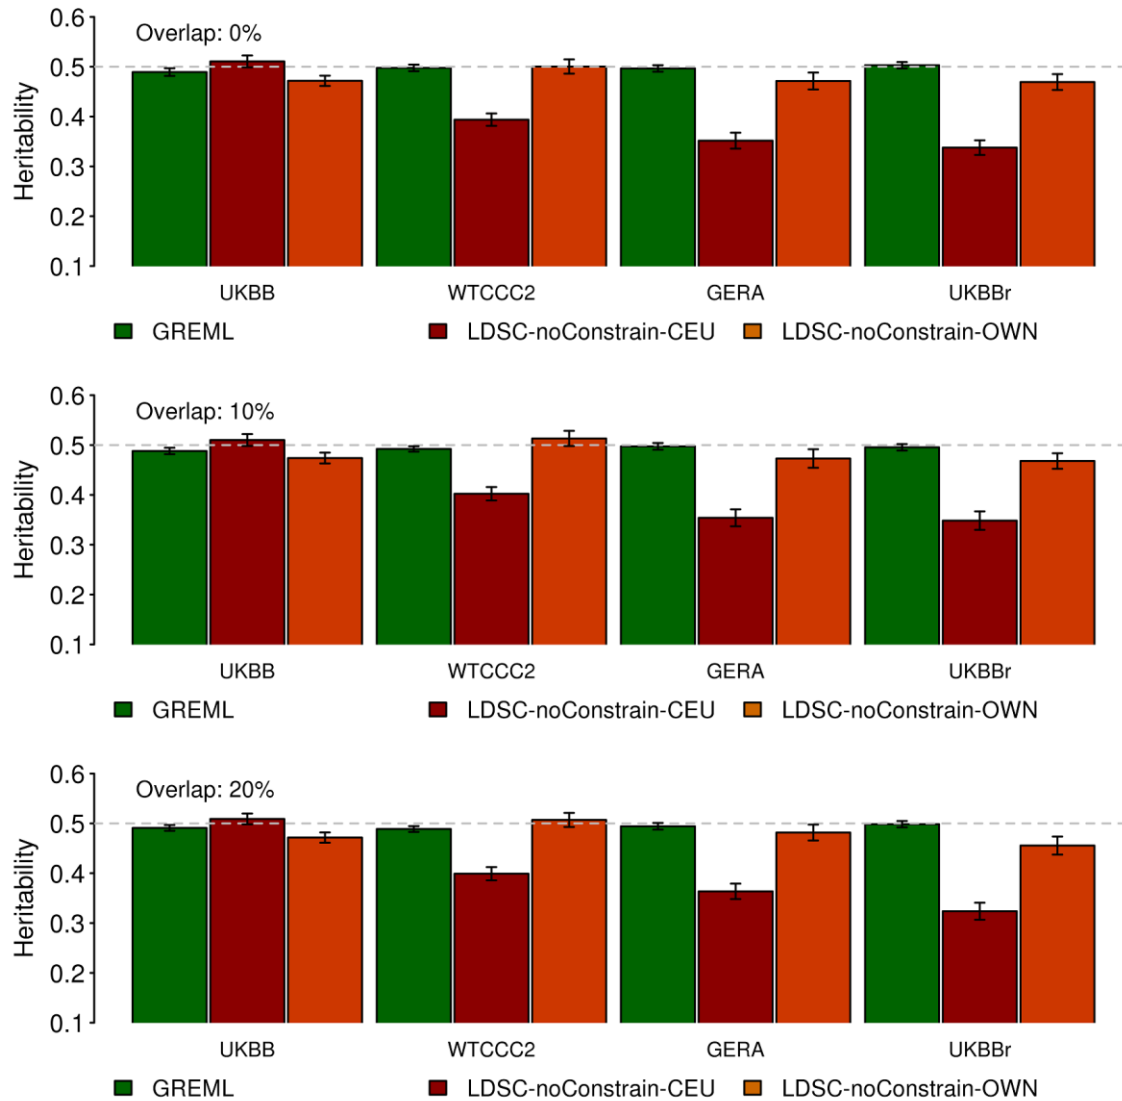

**Figure S10. Estimated heritability with GREML and LDSC (without constraining the intercept) based on UKBB, WTCCC2, GERA and UKBBr.**

UKBB: Imputed genotype data of UK Biobank sample; WTCCC2: Wellcome Trust Case Control Consortium 2; GERA: Genetic epidemiology research on adult health and aging cohort; UKBBr: Raw genotype data of UK Biobank sample. LDSC-noConstrain-CEU: using LD scores estimated based on the 1KG CEU reference sample. LDSC-noConstrain-OWN: using LD scores estimated based on the target sample (i.e. UKBB, WTCCC2, GERA or UKBBr).

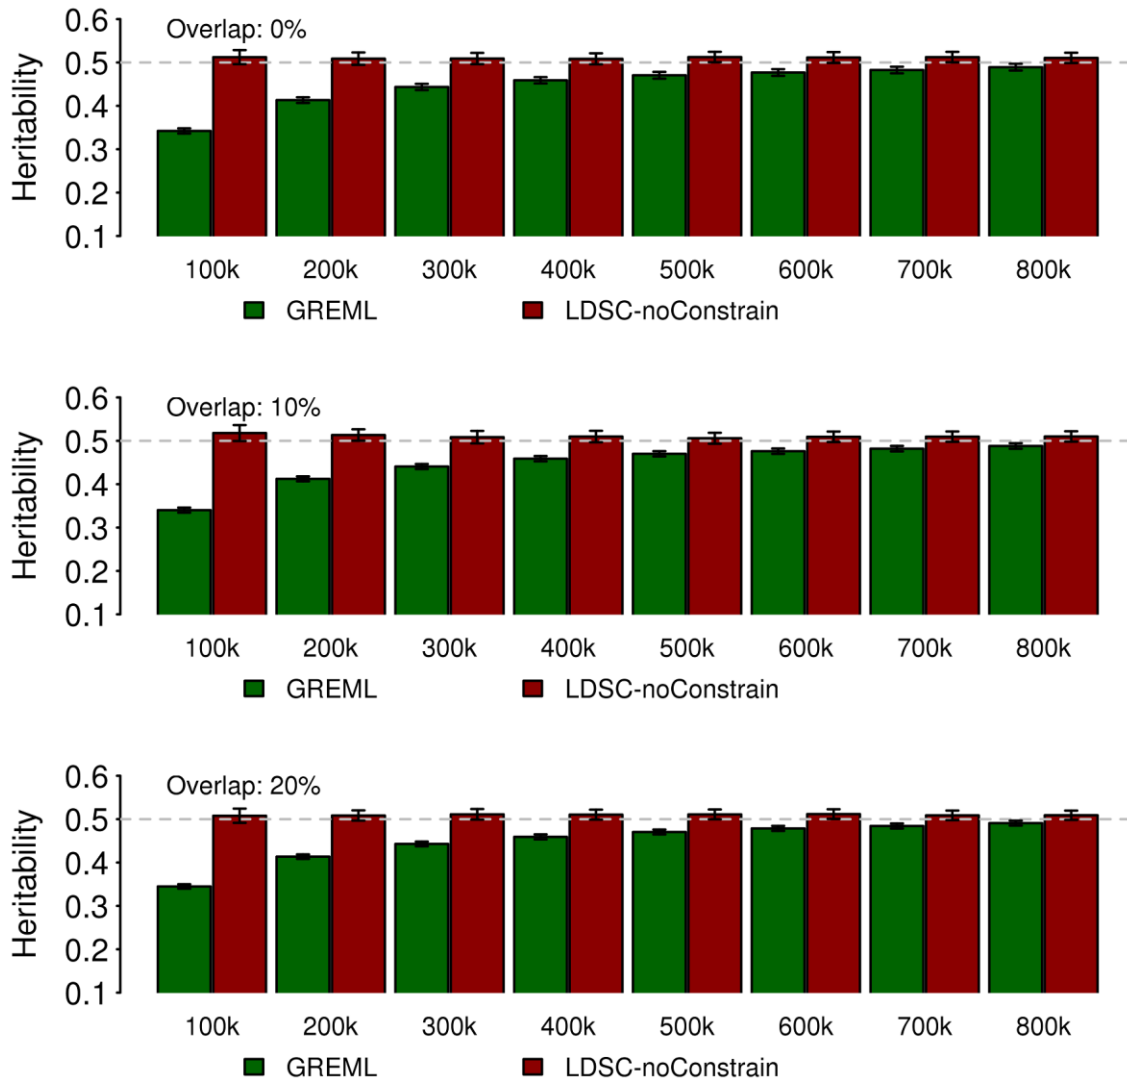

**Figure S11. Estimated heritability using simulated phenotypes based on UKBB genotypes.**

The number of causal SNPs in each bin reduced proportionally when the total number of SNPs decreased.

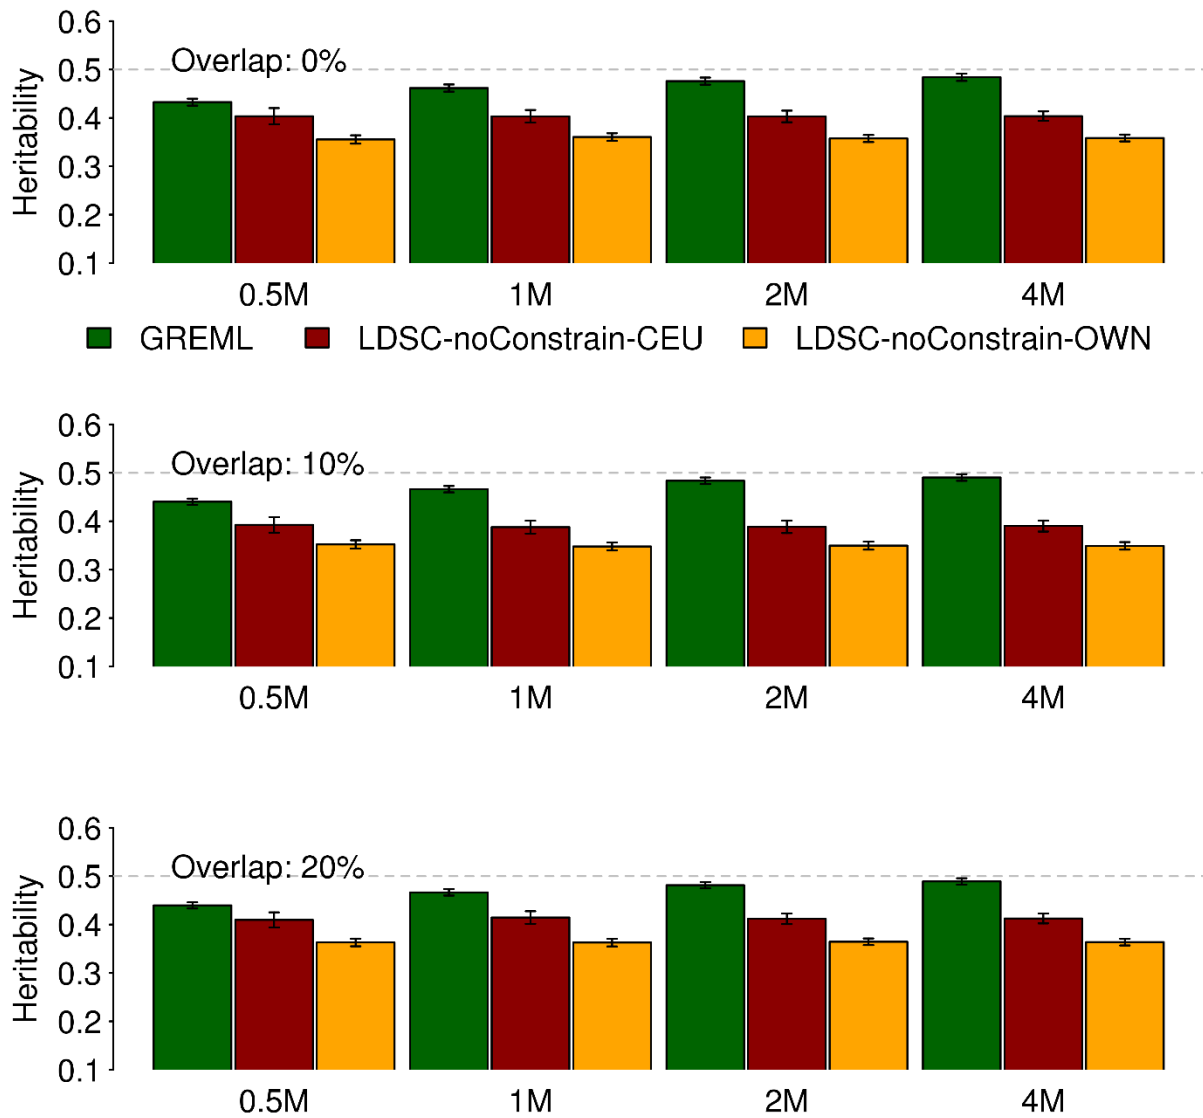

**Figure S12. Estimated heritability using simulated phenotypes based on UKBB genotypes.**

The number of SNPs in X-axis refers to SNPs used for GREML and LDSC. The simulated phenotypes were based on 6M SNPs (after QC) from which 10,000 SNPs were randomly selected as causal variants. SNPs in each bin were randomly and independently drawn from 6M SNPs. Thus, the number of causal SNPs in each bin reduced proportionally when the total number of SNPs decreased. LDSC-noConstrain-CEU: using LD scores estimated based on the 1KG CEU reference sample. LDSC-noConstrain-OWN: using LD scores estimated based on the target sample (i.e. UKBB).

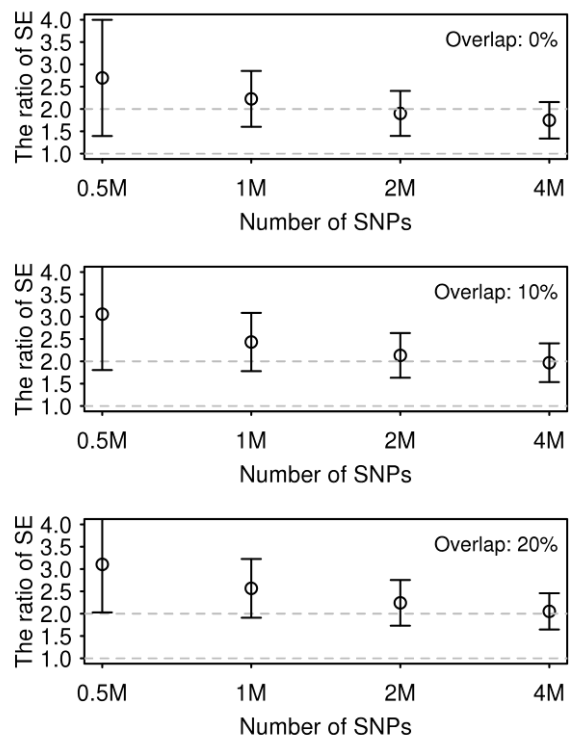

**Figure S13. The ratio of SE of LDSC estimate (using LD-scores estimated from 1KG reference sample) to that of GREML based on the results from Figure S10.**



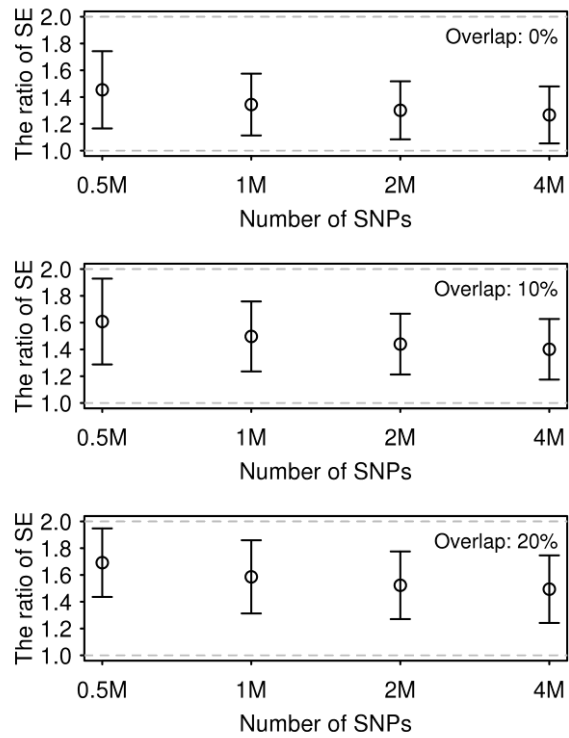

**Figure S14. The ratio of SE of LDSC estimate (using LD-scores estimated from UKBB (in-sample)) to that of GREML based on the results from Figure S10.**

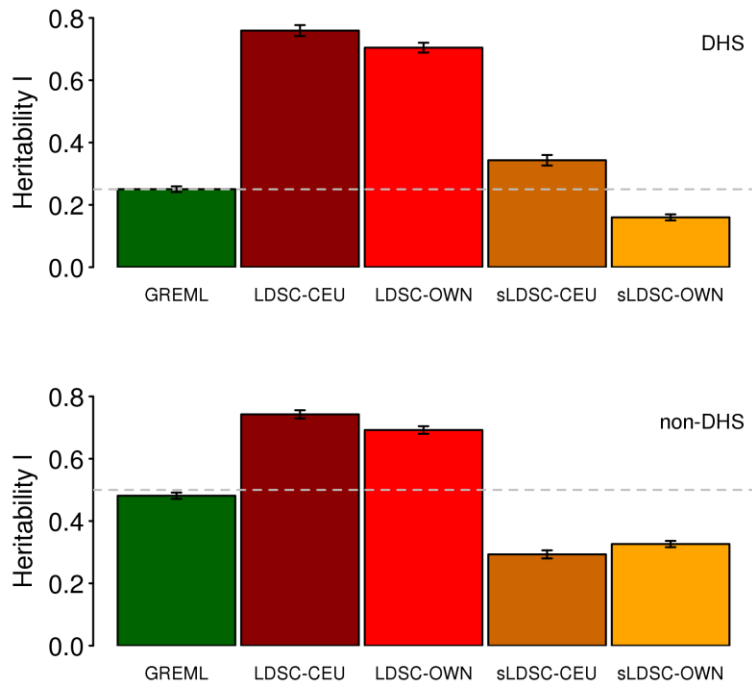

**Figure S15. Estimated SNP-heritability of simulated data based on a genomic partitioning model.**

LDSC-CEU: Using LD-scores estimated from 1KG reference data. LDSC-OWN: Using LD-scores estimated from UKBB. sLDSC-CEU: Using stratified LD-scores estimated from 1KG reference data. sLDSC-OWN: Using stratified LD-scores estimated from UKBB.

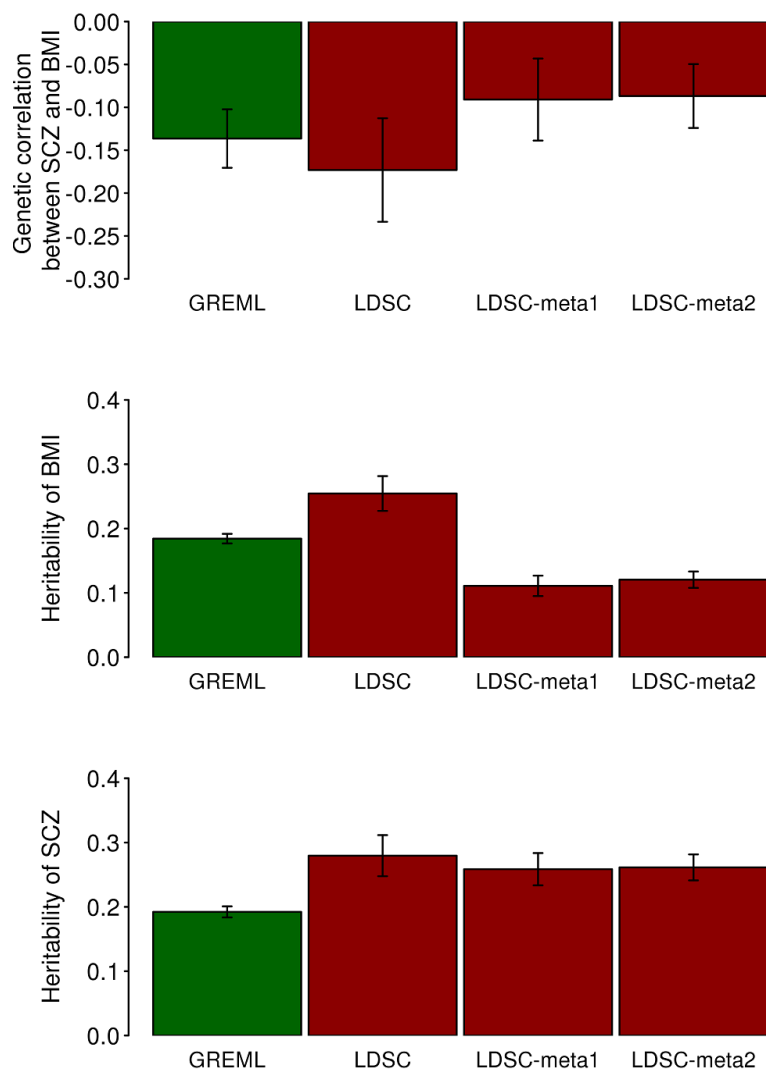

**Figure S16. Genetic correlation between BMI and SCZ and heritability estimated with GREML and LDSC.**

GREML: Analysis was based on quality controlled genetic data for BMI (from UK Biobank with 111,019 individuals and 518,992 SNPs) and schizophrenia (from PGC with 41,630 individuals and 518,992 SNPs). LDSC: The data sets used in LDSC were the same as in GREML. LDSC-meta1: GWAS summary statistics for BMI were based on meta-analysed GWAS results of UKBB individual-level genetic data (with 111,019 individuals and 518,992 SNPs) and of GIANT (245,051 individuals and 477,163 SNPs). For SCZ, the GWAS summary statistics from the full PGC sample based on 77,096 individuals were used. LDSC-meta2: The data sets used in LDSC-meta2 were the same as in LDSC-meta1 except for the increased number of SNPs (1,011,748) with which its performance was checked. Bars are standard errors.

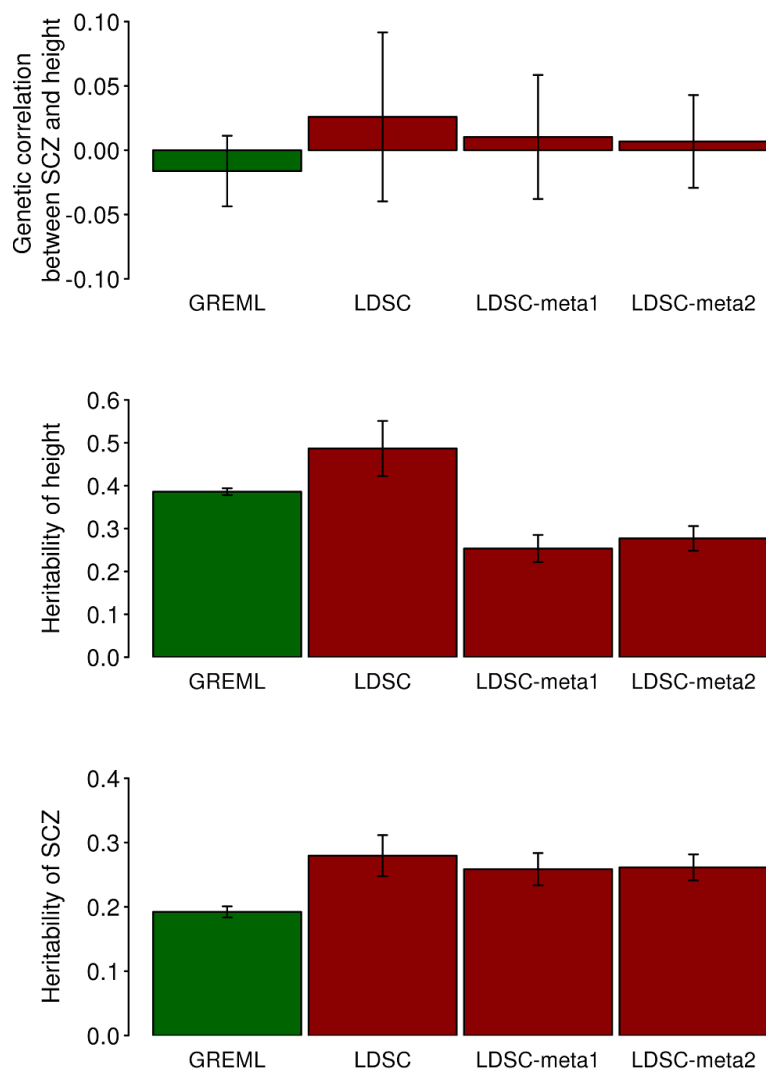

**Figure S17. Genetic correlation between height and SCZ and heritability estimated with GREML and LDSC.**

GREML: Analysis was based on quality controlled genetic data for height (from UK Biobank with 111,143 individuals and 518,992 SNPs) and schizophrenia (from PGC with 41,630 individuals and 518,992 SNPs). LDSC: The data sets used in LDSC were the same as in GREML. LDSC-meta1: GWAS summary statistics for height were based on meta-analysed GWAS results of UKBB individual-level genetic data (with 111,143 individuals and 518,992 SNPs) and of GIANT (253,280 individuals and 476,824 SNPs). For SCZ, the GWAS summary statistics from the full PGC sample based on 77,096 individuals were used. LDSC-meta2: The data sets used in LDSC-meta2 were the same as in LDSC-meta1 except for the increased number of SNPs (1,010,783) with which its performance was checked. Bars are standard errors.

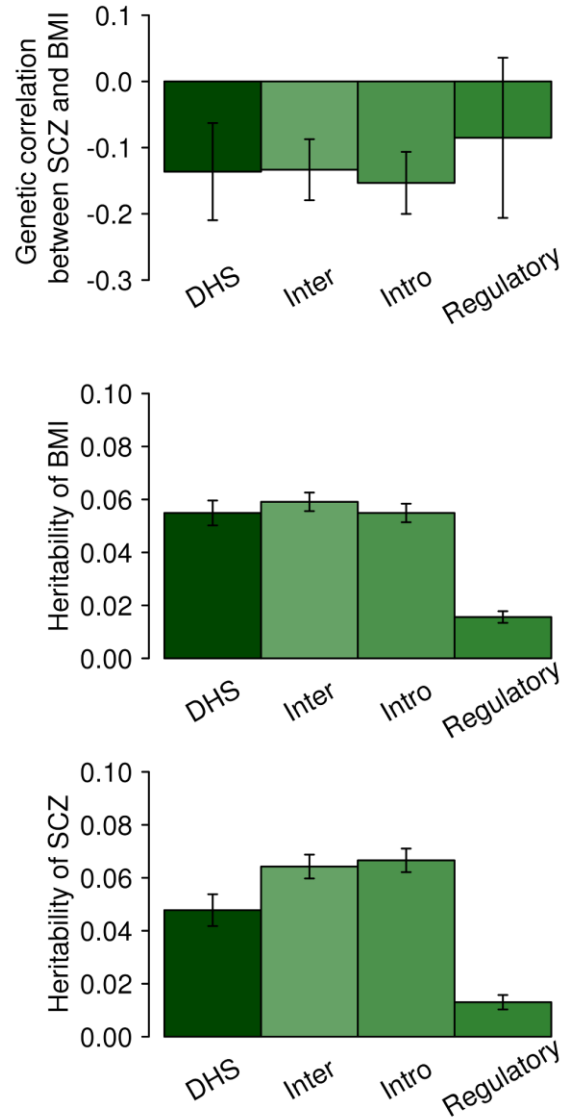

**Figure S18. Genetic correlation between SCZ and BMI and heritability based on SNPs in partitioned genomic regions estimated with GREML.**

A joint model was applied by fitting four genomic relationship matrices simultaneously, each estimated based on the set of SNPs belonging to each of the functional categories (DHS, intergenic and intronic regions, and regulatory). The bars are standard errors.

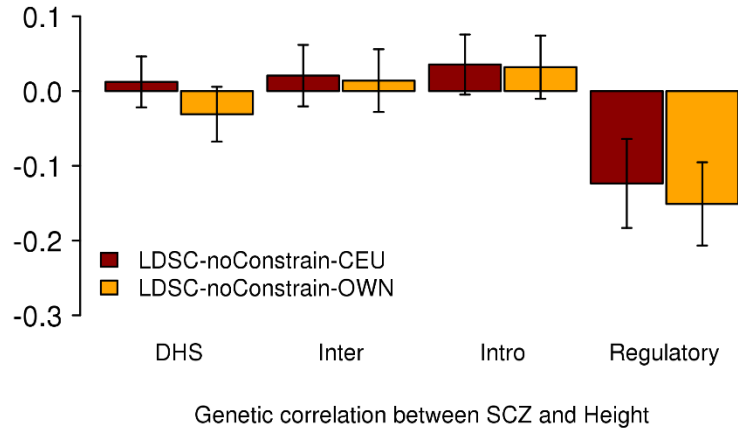

**Figure S19. Genetic correlation and standard error between SCZ and height estimated with LDSC.**

P-values for the estimate significantly different from 0 were 0.04, 0.38, 0.61 and 0.71 for LDSC-noConstrain-CEU, and 0.007, 0.45, 0.74 and 0.40 for LDSC-noConstrain-OWN for regulatory, intronic, intergenic and DHS regions, respectively. LDSC-noConstrain-CEU: using LD-scores estimated from 1KG reference data. LDSC-noConstrain-OWN: using LD-scores estimated from in-sample.

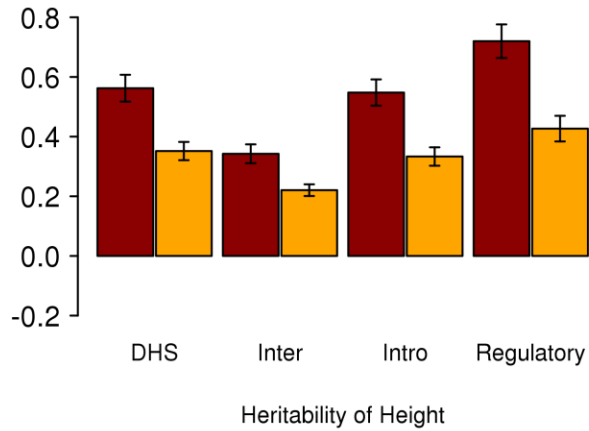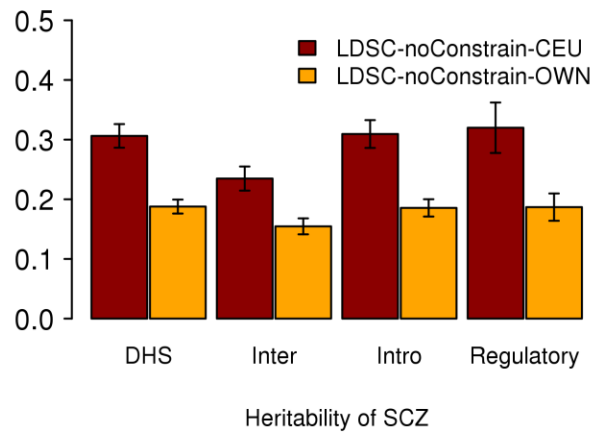

**Figure S20. Heritability and standard error of height and SCZ (in liability scale) estimated with LDSC.**

LDSC-noConstrain-CEU: using LD-scores estimated from 1KG reference data. LDSC-noConstrain-OWN: using LD-scores estimated from in-sample.

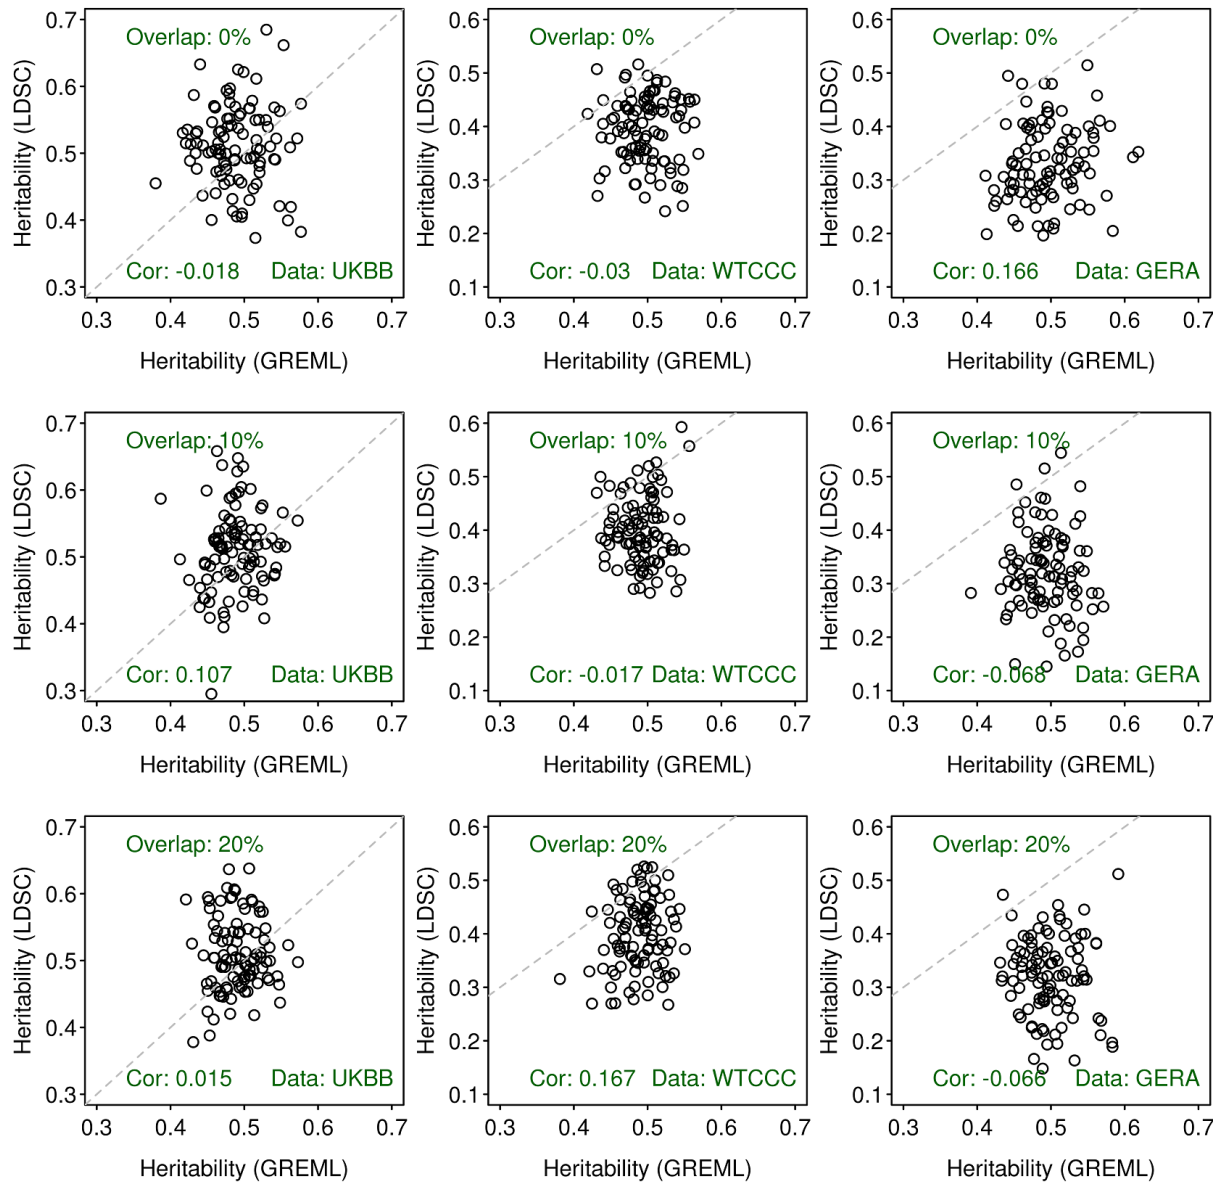

**Figure S21. Scatter plot of heritability from GREML and LDSC using UKBB, WTCCC2, or GEAR data.**



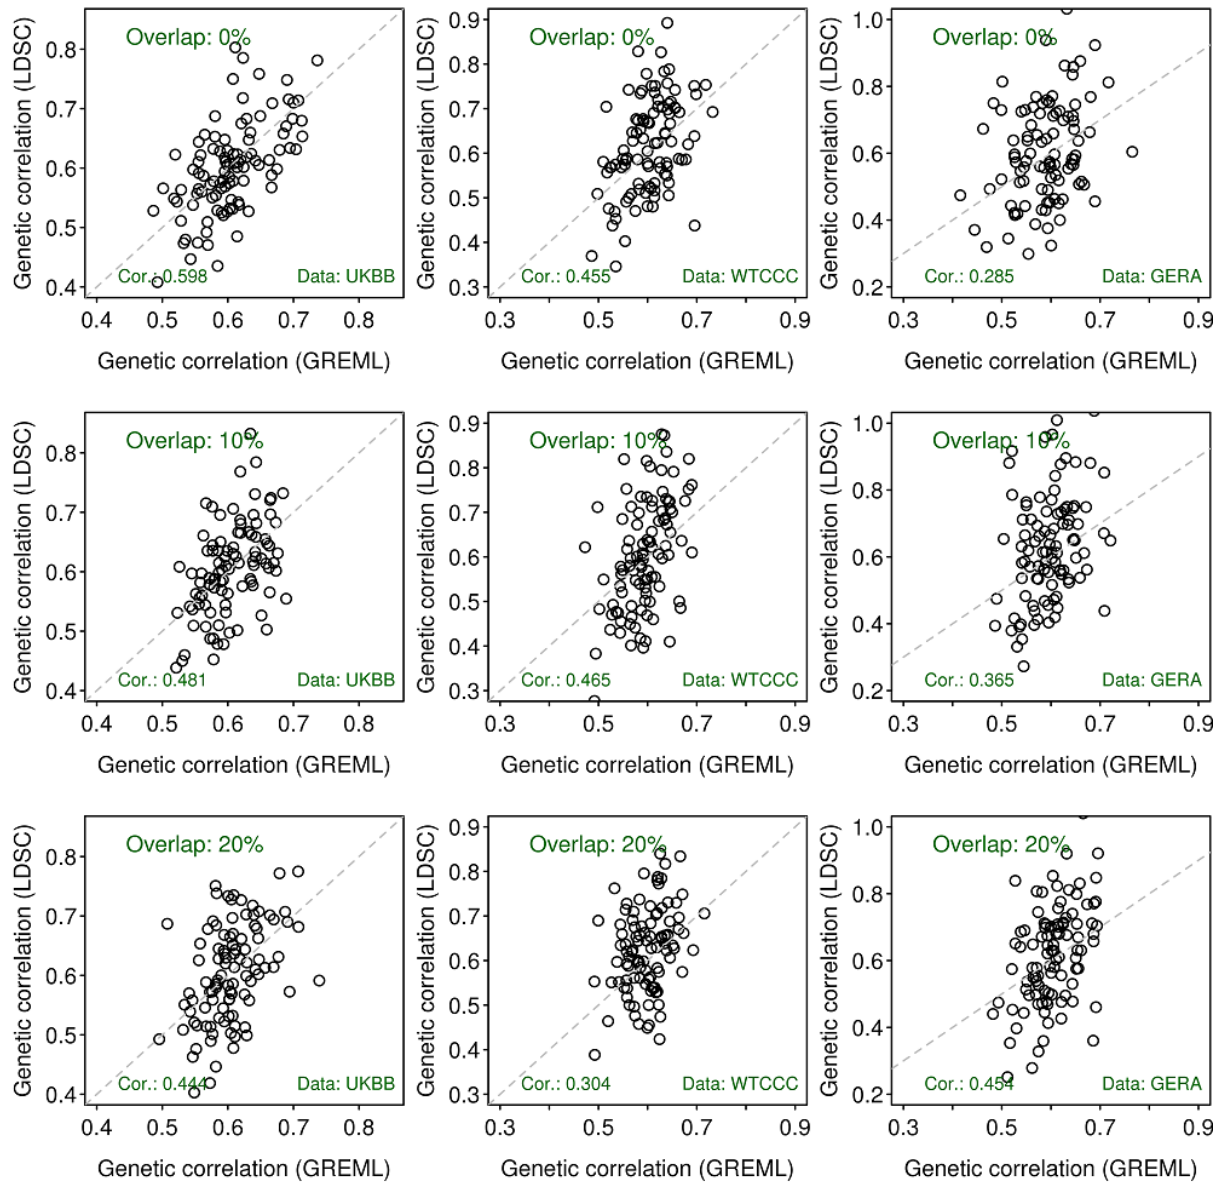

**Figure S22. Scatter plot of genetic correlation from GREML and LDSC using UKBB, WTCCC2, or GEAR data.**

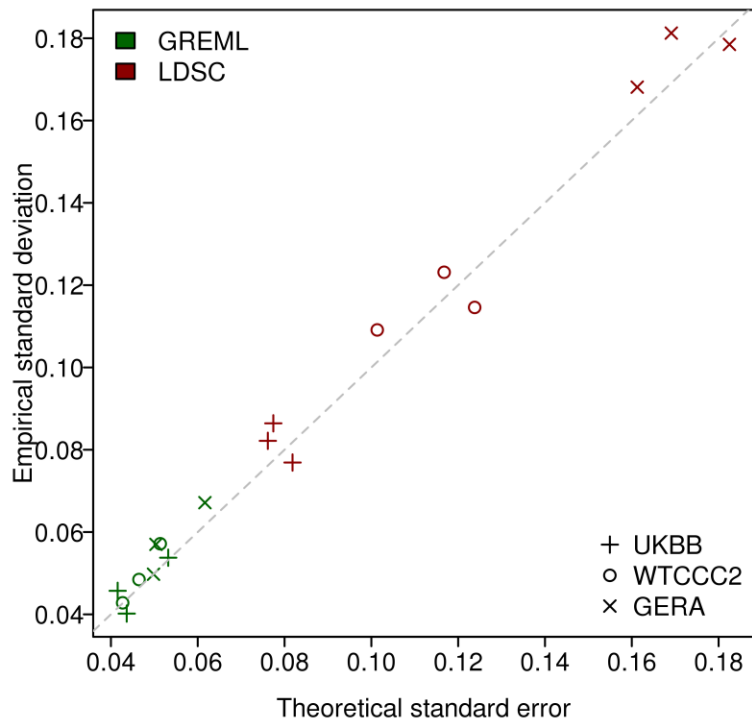

**Figure S23. Empirical and theoretical SE for GREML and LDSC.**

**Table S1a. Covariance and heritability estimated from LDSC and GREML when a simulated genetic covariance between the first and second trait is 0.15 and -0.3 for DHS and non-DHS, respectively<sup>a</sup>.**

|                | %Overlapping | Method | LD score | Covariance |                 | Variance I |      | Variance II |      |
|----------------|--------------|--------|----------|------------|-----------------|------------|------|-------------|------|
|                |              |        |          | Estimate   | SE <sup>b</sup> | Estimate   | SE   | Estimate    | SE   |
| True in DHS    |              |        |          | 0.15       |                 | 0.25       |      | 0.25        |      |
| DHS            | 0            | LDSC   | CEU      | -0.14      | 0.01            | 0.76       | 0.01 | 0.77        | 0.01 |
|                |              |        | OWN      | -0.13      | 0.01            | 0.70       | 0.01 | 0.71        | 0.01 |
|                |              | SLDSC  | CEU      | 0.09       | 0.01            | 0.54       | 0.31 | 0.57        | 0.06 |
|                |              |        | OWN      | 0.09       | 0.00            | 0.17       | 0.01 | 0.17        | 0.01 |
|                |              | GREML  | GREML    | 0.15       | 0.00            | 0.25       | 0.01 | 0.24        | 0.01 |
|                |              | 10     | LDSC     | CEU        | -0.14           | 0.01       | 0.75 | 0.01        | 0.77 |
|                | OWN          |        |          | -0.13      | 0.01            | 0.70       | 0.01 | 0.71        | 0.01 |
|                | SLDSC        |        | CEU      | 0.10       | 0.01            | 1.40       | 0.85 | 0.52        | 0.04 |
|                |              |        | OWN      | 0.10       | 0.00            | 0.17       | 0.01 | 0.17        | 0.01 |
|                | GREML        |        | GREML    | 0.15       | 0.00            | 0.25       | 0.00 | 0.24        | 0.00 |
|                | 20           |        | LDSC     | CEU        | -0.14           | 0.01       | 0.76 | 0.01        | 0.77 |
|                |              | OWN    |          | -0.13      | 0.01            | 0.71       | 0.01 | 0.71        | 0.01 |
| SLDSC          |              | CEU    | 0.09     | 0.01       | 0.64            | 0.18       | 0.54 | 0.05        |      |
|                |              | OWN    | 0.09     | 0.00       | 0.19            | 0.01       | 0.16 | 0.01        |      |
| GREML          |              | GREML  | 0.15     | 0.00       | 0.25            | 0.01       | 0.24 | 0.01        |      |
| True in nonDHS |              |        |          | -0.30      |                 | 0.50       |      | 0.50        |      |
| non-DHS        | 0            | LDSC   | CEU      | -0.17      | 0.01            | 0.74       | 0.01 | 0.74        | 0.01 |
|                |              |        | OWN      | -0.17      | 0.01            | 0.69       | 0.01 | 0.68        | 0.01 |
|                |              | SLDSC  | CEU      | -0.20      | 0.01            | -0.36      | 0.26 | 0.02        | 0.11 |
|                |              |        | OWN      | -0.19      | 0.00            | 0.33       | 0.01 | 0.31        | 0.01 |
|                |              | GREML  | GREML    | -0.29      | 0.00            | 0.48       | 0.01 | 0.50        | 0.01 |
|                |              | 10     | LDSC     | CEU        | -0.18           | 0.01       | 0.74 | 0.01        | 0.74 |

|    |       |       |       |      |       |      |      |      |
|----|-------|-------|-------|------|-------|------|------|------|
|    |       | OWN   | -0.17 | 0.01 | 0.69  | 0.01 | 0.68 | 0.01 |
|    | SLDSC | CEU   | -0.22 | 0.01 | -1.19 | 0.95 | 0.12 | 0.09 |
|    |       | OWN   | -0.20 | 0.00 | 0.31  | 0.01 | 0.31 | 0.01 |
|    | GREML | GREML | -0.29 | 0.00 | 0.48  | 0.01 | 0.49 | 0.00 |
|    | LDSC  | CEU   | -0.18 | 0.01 | 0.75  | 0.01 | 0.74 | 0.01 |
|    |       | OWN   | -0.17 | 0.01 | 0.69  | 0.01 | 0.68 | 0.01 |
|    | SLDSC | CEU   | -0.21 | 0.01 | 0.03  | 0.20 | 0.20 | 0.08 |
|    |       | OWN   | -0.19 | 0.00 | 0.33  | 0.01 | 0.31 | 0.01 |
| 20 | GREML | GREML | -0.29 | 0.00 | 0.48  | 0.01 | 0.49 | 0.01 |

<sup>a</sup> Simulation was based on 10,000 individuals that were randomly selected from UKBB with 858K SNP. Based on Gusev et al.<sup>1</sup>, the SNPs across the genome were stratified into two categories: DHS (194K SNPs with 2268 causal SNPs) and non-DHS (664K SNPs with 7732 causal SNPs). The genetic correlation (genetic covariance) for the simulated phenotypes between the first and second traits was 0.6 (0.15) and -0.6 (-0.3) in DHS and non-DHS region, respectively. The phenotypic variance is one. The genetic variance of two traits and covariance for DHS and non-DHS are presented in the table.

<sup>b</sup> The standard error were estimated based on 100 replicates.

**Table S1b. Covariance and heritability estimated from LDSC and GREML when a simulated genetic covariance between the first and second trait is 0.15 and -0.15 for DHS and non-DHS, respectively<sup>a</sup>.**

|                | %Overlapping | Method | LD score | Covariance |                 | Variance I |       | Variance II |      |
|----------------|--------------|--------|----------|------------|-----------------|------------|-------|-------------|------|
|                |              |        |          | Estimate   | SE <sup>b</sup> | Estimate   | SE    | Estimate    | SE   |
| True in DHS    |              |        |          | 0.15       |                 | 0.25       |       | 0.25        |      |
| DHS            | 0            | LDSC   | CEU      | 0.01       | 0.00            | 0.76       | 0.01  | 0.76        | 0.01 |
|                |              |        | OWN      | 0.01       | 0.00            | 0.71       | 0.01  | 0.71        | 0.01 |
|                |              | SLDSC  | CEU      | 0.12       | 0.01            | 0.77       | 0.18  | 0.58        | 0.08 |
|                |              |        | OWN      | 0.09       | 0.00            | 0.17       | 0.01  | 0.17        | 0.01 |
|                |              | GREML  | GREML    | 0.15       | 0.00            | 0.25       | 0.01  | 0.24        | 0.01 |
|                |              | 10     | LDSC     | CEU        | 0.03            | 0.00       | 0.75  | 0.01        | 0.77 |
|                | OWN          |        |          | 0.03       | 0.00            | 0.70       | 0.01  | 0.71        | 0.01 |
|                | SLDSC        |        | CEU      | 0.13       | 0.01            | 1.27       | 0.45  | 0.81        | 0.26 |
|                |              |        | OWN      | 0.10       | 0.00            | 0.17       | 0.01  | 0.17        | 0.01 |
|                | GREML        |        | GREML    | 0.15       | 0.00            | 0.25       | 0.00  | 0.24        | 0.00 |
|                | 20           |        | LDSC     | CEU        | 0.05            | 0.00       | 0.76  | 0.01        | 0.77 |
|                |              | OWN    |          | 0.05       | 0.00            | 0.71       | 0.01  | 0.71        | 0.01 |
| SLDSC          |              | CEU    | 0.12     | 0.01       | 1.17            | 0.76       | -0.24 | 0.80        |      |
|                |              | OWN    | 0.09     | 0.00       | 0.18            | 0.01       | 0.16  | 0.01        |      |
| GREML          | GREML        | 0.15   | 0.00     | 0.25       | 0.00            | 0.24       | 0.01  |             |      |
| True in nonDHS |              |        |          | -0.15      |                 | 0.50       |       | 0.50        |      |
| non-DHS        | 0            | LDSC   | CEU      | 0.00       | 0.00            | 0.74       | 0.01  | 0.74        | 0.01 |
|                |              |        | OWN      | 0.00       | 0.00            | 0.69       | 0.01  | 0.68        | 0.01 |
|                |              | SLDSC  | CEU      | -0.11      | 0.01            | -0.23      | 0.30  | 0.00        | 0.15 |
|                |              |        | OWN      | -0.09      | 0.00            | 0.31       | 0.01  | 0.32        | 0.01 |

|    |  |       |       |       |      |       |      |       |      |
|----|--|-------|-------|-------|------|-------|------|-------|------|
|    |  | GREML | GREML | -0.15 | 0.00 | 0.48  | 0.01 | 0.49  | 0.01 |
|    |  | LDSC  | CEU   | 0.02  | 0.00 | 0.74  | 0.01 | 0.74  | 0.01 |
|    |  |       | OWN   | 0.02  | 0.00 | 0.69  | 0.01 | 0.69  | 0.01 |
|    |  | SLDSC | CEU   | -0.12 | 0.01 | -1.97 | 1.47 | -0.13 | 0.21 |
|    |  |       | OWN   | -0.10 | 0.00 | 0.31  | 0.01 | 0.31  | 0.01 |
| 10 |  | GREML | GREML | -0.15 | 0.00 | 0.48  | 0.00 | 0.49  | 0.00 |
|    |  | LDSC  | CEU   | 0.04  | 0.00 | 0.75  | 0.01 | 0.74  | 0.01 |
|    |  |       | OWN   | 0.04  | 0.00 | 0.69  | 0.01 | 0.68  | 0.01 |
|    |  | SLDSC | CEU   | -0.11 | 0.01 | -0.61 | 0.89 | -0.02 | 0.27 |
|    |  |       | OWN   | -0.10 | 0.00 | 0.31  | 0.01 | 0.33  | 0.01 |
| 20 |  | GREML | GREML | -0.14 | 0.00 | 0.48  | 0.01 | 0.49  | 0.01 |

<sup>a</sup> Simulation was based on 10,000 individuals that were randomly selected from UKBB with 858K SNP. Based on Gusev et al.<sup>1</sup>, the SNPs across the genome were stratified into two categories: DHS (194K SNPs with 2268 causal SNPs) and non-DHS (664K SNPs with 7732 causal SNPs). The genetic correlation (genetic covariance) for the simulated phenotypes between the first and second traits was 0.6 (0.15) in DHS and -0.3 (-0.15) in non-DHS region, respectively. The phenotypic variance is one. The genetic variance of two traits and covariance for DHS and non-DHS are presented in the table.

<sup>b</sup> The standard error were estimated based on 100 replicates.

**Table S2 Heritability and genetic correlation based on different data sets**

| Method     | #SNPs   | Data                      | #individuals |         | h <sup>2</sup> height |          | h <sup>2</sup> SCZ (liability scale) |          | Genetic correlation |          |       |
|------------|---------|---------------------------|--------------|---------|-----------------------|----------|--------------------------------------|----------|---------------------|----------|-------|
|            |         |                           | Mean         | SD      | Estimate              | SE       | Estimate                             | SE       | Estimate            | SE       | P     |
| GREML      | 518992  | UKBB+<br>SCZ              | 152961.0     |         | 0.386                 | 4.10E-03 | 0.192                                | 4.39E-03 | -0.016              | 1.40E-02 | 0.247 |
| LDSC       | 516519  | UKBB+<br>SCZ              | 151385.1     | 1433.7  | 0.487                 | 3.28E-02 | 0.280                                | 1.63E-02 | 0.026               | 3.35E-02 | 0.439 |
| LDSC-meta1 | 476824  | UKBB+<br>GIANT+<br>PGCSCZ | 437303.9     | 8173.6  | 0.253                 | 1.62E-02 | 0.259                                | 1.28E-02 | 0.010               | 2.46E-02 | 0.675 |
| LDSC-meta2 | 1010783 | UKBB+<br>GIANT+<br>PGCSCZ | 428349.1     | 28211.2 | 0.277                 | 1.47E-02 | 0.261                                | 1.03E-02 | 0.007               | 1.84E-02 | 0.712 |

GREML: Analysis was based on quality controlled genetic data for height (from UK Biobank with 111,143 individuals and 518,992 SNPs) and schizophrenia (from PGC with 41,630 individuals and 518,992 SNPs).

LDSC: The data sets used in LDSC were the same as in GREML.

LDSC-meta1: GWAS summary statistics for height were based on meta-analysed GWAS results of UKBB individual-level genotype data (with 111,143 individuals and 518,992 SNPs) and of GIANT (253,280 individuals and 476,824 SNPs). For SCZ, the GWAS summary statistics from the full PGC sample based on 77,096 individuals was used.

LDSC-meta2: The data sets used in LDSC-meta2 were the same as in LDSC-meta1 except for the increased number of SNPs (1,010,783) with which its performance was checked.

Due to different call rates of each SNP, the numbers of individuals for each SNP used in GWAS were different (see the column of the number of individuals with mean and SD).

**Table S3 Heritability estimated from GREML and stratified LDSC based on the real data sets in the genomic partitioning analyses**

| <b>BMI</b>                      |                    |              |               |                    |                         |                                         |                                    |               |        |
|---------------------------------|--------------------|--------------|---------------|--------------------|-------------------------|-----------------------------------------|------------------------------------|---------------|--------|
|                                 |                    | <b>GREML</b> |               |                    |                         |                                         | <b>Stratified LDSC<sup>a</sup></b> |               |        |
|                                 | Proportion of SNPs | Estimate     | SE (Estimate) | Ratio <sup>b</sup> | SE (ratio) <sup>c</sup> | Enrichment <u>P</u> -value <sup>d</sup> | Estimate                           | SE (Estimate) | Ratio  |
| <b>Regulatory</b>               | 0.065              | 0.016        | 0.002         | 0.085              | 0.012                   | 5.61E-02                                | 0.012                              | 0.006         | 0.060  |
| <b>DHS</b>                      | 0.225              | 0.055        | 0.005         | 0.298              | 0.025                   | 1.74E-03                                | 0.084                              | 0.015         | 0.411  |
| <b>Intron</b>                   | 0.287              | 0.055        | 0.004         | 0.298              | 0.018                   | 5.54E-01                                | 0.054                              | 0.008         | 0.262  |
| <b>Intergenic</b>               | 0.424              | 0.059        | 0.004         | 0.320              | 0.017                   | 1.76E-09                                | 0.055                              | 0.009         | 0.267  |
| <b>Total</b>                    | 1.000              | 0.185        | -             | 1.000              | -                       | -                                       | 0.206                              | 0.012         | 1.000  |
| <b>Whole genome<sup>e</sup></b> | 1.000              | 0.184        | 0.004         | -                  | -                       | -                                       | 0.255                              | 0.014         | -      |
| <b>Height</b>                   |                    |              |               |                    |                         |                                         |                                    |               |        |
|                                 |                    | <b>GREML</b> |               |                    |                         |                                         | <b>Stratified LDSC</b>             |               |        |
|                                 | Proportion of SNPs | Estimate     | SE (Estimate) | Ratio              | SE (ratio)              | Enrichment <u>P</u> -value              | Estimate                           | SE (Estimate) | Ratio  |
| <b>Regulatory</b>               | 0.065              | 0.094        | 0.004         | 0.246              | 0.009                   | 7.60E-92                                | 0.117                              | 0.012         | 0.261  |
| <b>DHS</b>                      | 0.225              | 0.167        | 0.005         | 0.438              | 0.014                   | 2.38E-54                                | 0.421                              | 0.031         | 0.942  |
| <b>Intron</b>                   | 0.287              | 0.071        | 0.004         | 0.187              | 0.011                   | 7.83E-22                                | -0.017                             | 0.014         | -0.038 |
| <b>Intergenic</b>               | 0.424              | 0.049        | 0.004         | 0.130              | 0.009                   | 7.29E-226                               | -0.074                             | 0.016         | -0.165 |
| <b>Total</b>                    | 1.000              | 0.381        | -             | 1.000              | -                       | -                                       | 0.447                              | 0.026         | 1.000  |
| <b>Whole genome</b>             | 1.000              | 0.386        | 0.004         | -                  | -                       | -                                       | 0.487                              | 0.033         | -      |
| <b>SCZ<sup>f</sup></b>          |                    |              |               |                    |                         |                                         |                                    |               |        |
|                                 |                    | <b>GREML</b> |               |                    |                         |                                         | <b>Stratified LDSC</b>             |               |        |
|                                 | Proportion of SNPs | Estimate     | SE (Estimate) | Ratio              | SE (ratio)              | Enrichment <u>P</u> -value              | Estimate                           | SE (Estimate) | Ratio  |
| <b>Regulatory</b>               | 0.065              | 0.013        | 0.003         | 0.068              | 0.014                   | 1.67E+00                                | 0.021                              | 0.008         | 0.095  |
| <b>DHS</b>                      | 0.225              | 0.048        | 0.006         | 0.249              | 0.031                   | 3.62E-01                                | 0.068                              | 0.020         | 0.303  |
| <b>Intron</b>                   | 0.287              | 0.067        | 0.004         | 0.347              | 0.022                   | 3.72E-03                                | 0.076                              | 0.009         | 0.340  |
| <b>Intergenic</b>               | 0.424              | 0.064        | 0.005         | 0.335              | 0.022                   | 2.41E-05                                | 0.059                              | 0.010         | 0.262  |



|                     |       |       |       |       |   |   |       |       |       |
|---------------------|-------|-------|-------|-------|---|---|-------|-------|-------|
| <b>Total</b>        | 1.000 | 0.192 | -     | 1.000 | - | - | 0.244 | -     | 1.000 |
| <b>Whole genome</b> | 1.000 | 0.192 | 0.004 | -     | - | - | 0.280 | 0.016 | -     |

<sup>a</sup>GWAS summary statistics used in the stratified LDSC were based on the same genotype data used in GREML (Table 3). Because we used our own annotation that had discrete categories, for which the stratified LDSC does not provide stratified LD scores, we had to calculate stratified LD scores using the individual-level genotype data.

<sup>b</sup>Ratio is the proportion of each estimate over the sum of all estimates.

<sup>c</sup>SE (ratio) is estimated using the delta method implemented in MTG2. For such discrete annotated categories, the stratified LDSC does not provide the SE of the ratio.

<sup>d</sup>Enrichment p-value was obtained from the Wald test.

<sup>e</sup>Whole-genome analyses were based on all the SNPs across the genome (i.e. Table 3).

<sup>f</sup>The estimates of SCZ are in the liability scale.

**Table S4. The computational and memory requirements for bivariate GREML and LDSC for 800k SNPs using a single CPU running at 2.1 GHz**

| Methods | #individuals/trait | Memory | Time (minute) |
|---------|--------------------|--------|---------------|
| GREML   | 5,000              | 1333MB | 4             |
| LDSC    |                    | 544MB  | 1             |
| GREML   | 10,000             | 6228MB | 32            |
| LDSC    |                    | 544MB  | 1             |
| GREML   | 20,000             | 18.5GB | 198           |
| LDSC    |                    | 544MB  | 1             |

It is noted that MTG2 software used for the bivariate GREML can facilitate parallel computing and increase the computation efficiency approximately by a factor of 10 when using 20 CPUs.

## SUPPLEMENTAL METHODS

### **Genetic data**

#### *Schizophrenia (SCZ) data*

The SCZ GWAS data were from the second phase of the Psychiatric Genomic Consortium<sup>2</sup> (PGC). Quality control (QC) and imputation of raw autosomal SNPs was performed by PGC using the imputation program IMPUTE2/SHAPEIT<sup>3;4</sup> with CEU samples from the 1000 Genomes Project dataset<sup>5</sup> as the reference set. Post-imputation quality control was performed for each cohort as described in Mehta et al.<sup>6</sup>, and subsequently merged across all cohorts. Based on the merged genotype data, we utilized HapMap3 SNPs with a call rate  $\geq 0.9$  and individuals with a call rate  $\geq 0.9$ . In addition, one individual in a pair was randomly excluded if their genomic relationship was  $\geq 0.05$ . After QC, 688,145 SNPs and 41,630 individuals (18,987 cases and 22,673 controls) remained.

#### *UK Biobank (UKBB)*

Based on the data released in the first version of UKBB<sup>7</sup>, which were collected from a community sample, there were initially 152,249 individuals and 72,355,667 imputed SNPs available. Non-ambiguous strand SNPs identified in HapMap3 with imputation INFO  $\geq 0.6$ , minor allele frequency (MAF)  $\geq 0.01$ , call rate  $\geq 0.95$  and Hardy-Weinberg equilibrium P-value  $\geq 10^{-7}$  were retained. Individuals with call rate  $\geq 0.95$  and clustered as Caucasian, which were within six standard deviations from the mean of the EUR reference sample<sup>8</sup> based on the first and second principal components of the genomic relationship matrix were retained. Similar to the SCZ sample, one individual per pair was randomly excluded if their genomic relationship

was  $> 0.05$  within the UKBB sample. In addition, UKBB samples were excluded if their genomic relationship with SCZ samples was  $> 0.05$ . After QC, 111,330 individuals, 858,991 SNPs were available. In addition to the imputed UKBB data, the raw genotype data of UKBB (UKBBr) were used for a comparison analysis. Raw genotypes were available for 805,426 SNPs from the UK Biobank and UK BiLEVE Axiom array. After the same QC process as above and matching with the HapMap3 SNPs, 111,330 individuals and 123,921 SNPs were used for the simulation study.

#### *Wellcome Trust Case Control Consortium 2 (WTCCC2)*

The WTCCC2 data<sup>9-12</sup> were combined from four disease datasets (ischaemic stroke, multiple sclerosis, primary biliary cirrhosis, and psoriasis) and two controls (1958 Birth cohort and UK Blood Service) which were genotyped with Illumina Human 1M-Duo BeadChip and QCed separately as follows: SNPs were excluded due to either call rate  $\leq 0.95$ , MAF  $< 0.01$ , HWE P-value  $< 1E-4$  or significantly ( $P < 1E-5$ ) different call rates between cases and controls. Individuals were excluded due to either individual call rate  $\leq 0.97$ , being duplicated, genomic relationship  $> 0.185$  or being of non-CEU ancestry. In the combined genotype data, we further excluded those SNPs with a call rate  $\leq 0.95$ , HWE P-value  $\leq 10E-7$ , or MAF  $\leq 0.01$  and one random individual in a pair with high relatedness ( $> 0.05$ ). After QC, 20,659 individuals each with 432,663 SNPs were available for the simulation study.

#### *Genetic epidemiology research on adult health and aging cohort (GERA)*

The details of GERA data and its QC process was described in Lee et al.<sup>13</sup>. Briefly, genetic data were strictly from participants of the Kaiser Permanente GERA cohort with European ancestry<sup>14</sup>. In the QC step, SNPs were excluded due to either call rate  $\leq 0.95$ , HWE p-

value  $\leq 10E-4$ , or MAF  $\leq 0.01$ . Only HapMap3 SNPs were retained for the simulation and analyses. Individuals were excluded due to either call rate  $\leq 0.95$  or being population outliers (i.e. greater than six SD from the first and second principal components). One individual in a pair with genomic relationship larger than 0.05 was randomly excluded. After QC, 46,345 individuals each with 239,976 SNPs were available for the simulation study.

## **Simulation**

The simulation process was based on the individual-level genotype data of UKBB (111,330 individuals and 858,991 imputed or 123,921 raw genotyped SNPs), WTCCC2 (20,659 individuals and 432,663 SNPs), and GERA (46,345 individuals and 239,976 SNPs), respectively.

### *Phenotype Simulation*

For the bivariate model, 10,000 SNPs were randomly selected as causal variants, and assigned two sets of causal effects following a multivariate normal distribution with mean  $[0, 0]$  and (co)variance matrix as  $\begin{bmatrix} 1 & 0.6 \\ 0.6 & 1 \end{bmatrix}$ . Thus, the genetic correlation between the first and second traits was 0.6. True breeding values or genetic profile scores were obtained from the products of SNP genotypes and the corresponding SNP effects. The simulated phenotypes were generated as the sum of the true genetic profile scores and the residual effects that were drawn from a multivariate normal distribution with mean  $[0, 0]$  and the covariance matrix  $\begin{bmatrix} 1 & 0.8 \\ 0.8 & 1 \end{bmatrix}$ . Therefore, the simulated true heritability was 0.5 for both first and second traits.

For the sample available in each dataset, a random set of 10,000 individuals was made available for the first and second trait, respectively, such that the percentage of overlapping individuals between the first and second traits was 0, 10 or 20%. Genetic correlation between

two simulated traits was estimated using GREML and LDSC. The details of the methods are well documented elsewhere<sup>15-19</sup>. The number of replicates was 100. The simulation process was conducted using MTG2<sup>15; 20</sup>.

For sensitivity analyses using UKBB data, a different number of individuals (2500, 5000 or 15000) or a different number of SNPs (100, 200 ... 700k) was used. For testing a different number of SNPs, a subset of SNPs was randomly selected from 858,991 SNPs from which 10,000 SNPs were randomly selected as causal variants to simulate phenotypes as above. We also tested a situation where the number of causal SNPs was proportionally reduced in a subset of randomly selected SNPs that used the same causal variants as the original 858,991 SNPs.

#### *Simulation for genomic partitioning analyses.*

This simulation was based on the QCed UKBB genotype data with 858,991 SNPs. According to Gusev et al.<sup>1</sup>, the genomic regions were divided into two categories: DHS (194,778 SNPs) and non-DHS (664,213 SNPs). Phenotypes were simulated for the categories such that the heritability was 0.25 and 0.5 for the DHS region and non-DHS regions, respectively. The genetic correlation between the first and second traits was 0.6 and -0.6 for DHS and non-DHS regions, respectively. In an alternative scenario, we simulated the genetic correlation between DHS regions being 0.6 and the genetic correlation between non-DHS regions being -0.3. For the genetic correlation, we gave substantially different values between the DHS and non-DHS regions to make the contrast clear in the estimation, which also increased the power to assess the performance of the methods. The residual correlation between two traits was 0.8. For the sample, 10,000 individuals were randomly selected for each trait to perform GREML and LDSC with different levels (0, 10, or 20%) of overlapping individuals between the two traits. For the GREML genomic partitioning analysis, genomic relationship matrices<sup>9</sup> (estimated based on the

information of the functional categories) were jointly fitted to estimate SNP-heritability and genetic correlation for each category. For the LDSC partitioning analysis, we used the sLDSC (i.e. --h2 flag in sLDSC software)<sup>21</sup>, which could estimate SNP-heritability for each category, following Finucane et al.<sup>21</sup> in the case of non-overlapping categories. We also used sLDSC to estimate genetic correlation between traits for each category (i.e. --rg flag). Unlike --h2 function in sLDSC, there is neither documented instruction nor a publication verifying the function, and the software does not provide SE of estimates. Therefore, we limited our use of the --rg function in sLDSC to simulated data only. Because of the limitation of sLDSC (--rg), we also used LDSC estimates based on a subset of SNPs belonging to each category to obtain a genetic correlation for each category, which also give more insights into the method.

## **Real data analyses**

We used LDSC and GREML to estimate SNP-heritability and genetic correlation for the real data sets. Traits of interest were height, body mass index (BMI), and SCZ. After QC as described above, the number of phenotypic records was 111,143 for height and 111,019 for BMI from the UKBB, and 41,630 for SCZ from PGC. The number of SNPs was 518,992. The SNP number was reduced compared to the simulation study because only the SNPs common to both UKBB and SCZ could be used to build a genomic relationship in GREML. Phenotypic records of height and BMI were adjusted for age at interview, the assessment centre at which participant consented, genotype batch, year of birth and the first 15 principal components (PCs). SCZ were adjusted for sex, cohort and the first 15 PCs. The pre-adjusted phenotypes were used for GREML and LDSC estimations. In addition, publicly available GWAS summary statistics for height, BMI and SCZ were used for LDSC (LDSC-meta). The GWAS results for height and

BMI from GIANT<sup>22; 23</sup> and those for SCZ from the full PGC samples<sup>2</sup> were meta-analysed with SNPs treated as fixed effects.

Genomic partitioning analysis was applied. Based on Gusev et al.<sup>1</sup>, we stratified the genome into four categories, i.e. regulatory, DHS, intronic and intergenic region. The regulatory category includes promoters (within 2kbp of a transcription start site), UTR (overlapping a 5' or 3' untranslated region) and coding (overlapping a coding exon). DHS includes chromatin zones that are sensitive to cleavage by the DNase I enzyme, observed in any cell-type. Intronic and intergenic regions include introns and all other intergenic variants except regulatory, DHS and introns. We used the GREML, LDSC and sLDSC to estimate SNP-heritability and genetic correlation for each category in the same manner as in the analyses of the simulated data except that we did not attempt using sLDSC with --rg flag for the real data analysis because of its incompleteness (e.g. SE estimates are not provided).



SCHIZOPHRENIA WORKING GROUP OF THE PSYCHIATRIC GENOMICS  
CONSORTIUM

Stephan Ripke<sup>1,2</sup>, Benjamin M. Neale<sup>1,2,3,4</sup>, Aiden Corvin<sup>5</sup>, James T. R. Walters<sup>6</sup>, Kai-How Farh<sup>1</sup>, Peter A. Holmans<sup>6,7</sup>, Phil Lee<sup>1,2,4</sup>, Brendan Bulik-Sullivan<sup>1,2</sup>, David A. Collier<sup>8,9</sup>, Hailiang Huang<sup>1,3</sup>, Tune H. Pers<sup>3,10,11</sup>, Ingrid Agartz<sup>12,13,14</sup>, Esben Agerbo<sup>15,16,17</sup>, Margot Albus<sup>18</sup>, Madeline Alexander<sup>19</sup>, Farooq Amin<sup>20,21</sup>, Silviu A. Bacanu<sup>22</sup>, Martin Begemann<sup>23</sup>, Richard A. Belliveau Jr<sup>2</sup>, Judit Bene<sup>24,25</sup>, Sarah E. Bergen<sup>2,26</sup>, Elizabeth Bevilacqua<sup>2</sup>, Tim B. Bigdeli<sup>22</sup>, Donald W. Black<sup>27</sup>, Richard Bruggeman<sup>28</sup>, Nancy G. Buccola<sup>29</sup>, Randy L. Buckner<sup>30,31,32</sup>, William Byerley<sup>33</sup>, Wiepke Cahn<sup>34</sup>, Guiqing Cai<sup>35,36</sup>, Dominique Champion<sup>37</sup>, Rita M. Cantor<sup>38</sup>, Vaughan J. Carr<sup>39,40</sup>, Noa Carrera<sup>6</sup>, Stanley V. Catts<sup>39,41</sup>, Kimberly D. Chambert<sup>2</sup>, Raymond C. K. Chan<sup>42</sup>, Ronald Y. L. Chen<sup>43</sup>, Eric Y. H. Chen<sup>43,44</sup>, Wei Cheng<sup>45</sup>, Eric F. C. Cheung<sup>46</sup>, Siow Ann Chong<sup>47</sup>, C. Robert Cloninger<sup>48</sup>, David Cohen<sup>49</sup>, Nadine Cohen<sup>50</sup>, Paul Cormican<sup>5</sup>, Nick Craddock<sup>6,7</sup>, James J. Crowley<sup>51</sup>, David Curtis<sup>52,53</sup>, Michael Davidson<sup>54</sup>, Kenneth L. Davis<sup>36</sup>, Franziska Degenhardt<sup>55,56</sup>, Jurgen Del Favero<sup>57</sup>, Ditte Demontis<sup>17,58,59</sup>, Dimitris Dikeos<sup>60</sup>, Timothy Dinan<sup>61</sup>, Srdjan Djurovic<sup>14,62</sup>, Gary Donohoe<sup>5,63</sup>, Elodie Drapeau<sup>36</sup>, Jubao Duan<sup>64,65</sup>, Frank Dudbridge<sup>66</sup>, Naser Durmishi<sup>67</sup>, Peter Eichhammer<sup>68</sup>, Johan Eriksson<sup>69,70,71</sup>, Valentina Escott-Price<sup>6</sup>, Laurent Essioux<sup>72</sup>, Ayman H. Fanous<sup>73,74,75,76</sup>, Martilias S. Farrell<sup>51</sup>, Josef Frank<sup>77</sup>, Lude Franke<sup>78</sup>, Robert Freedman<sup>79</sup>, Nelson B. Freimer<sup>80</sup>, Marion Friedl<sup>81</sup>, Joseph I. Friedman<sup>36</sup>, Menachem Fromer<sup>1,2,4,82</sup>, Giulio Genovese<sup>2</sup>, Lyudmila Georgieva<sup>6</sup>, Ina Giegling<sup>81,83</sup>, Paola Giusti-Rodriguez<sup>51</sup>, Stephanie Godard<sup>84</sup>, Jacqueline I. Goldstein<sup>1,3</sup>, Vera Golimbet<sup>85</sup>, Srihari Gopal<sup>86</sup>, Jacob Gratten<sup>87</sup>, Lieuwe de Haan<sup>88</sup>, Christian Hammer<sup>23</sup>, Marian L. Hamshere<sup>6</sup>, Mark Hansen<sup>89</sup>, Thomas Hansen<sup>17,90</sup>, Vahram Haroutunian<sup>36,91,92</sup>, Annette M. Hartmann<sup>81</sup>, Frans A.

Henskens<sup>39,93,94</sup>, Stefan Herms<sup>55,56,95</sup>, Joel N. Hirschhorn<sup>3,11,96</sup>, Per Hoffmann<sup>55,56,95</sup>, Andrea Hofman<sup>55,56</sup>, Mads V. Hollegaard<sup>97</sup>, David M. Hougaard<sup>97</sup>, Masashi Ikeda<sup>98</sup>, Inge Joa<sup>99</sup>, Antonio Juliá<sup>100</sup>, René S. Kahn<sup>34</sup>, Luba Kalaydjieva<sup>101,102</sup>, Sena Karachanak-Yankova<sup>103</sup>, Juha Karjalainen<sup>78</sup>, David Kavanagh<sup>6</sup>, Matthew C. Keller<sup>104</sup>, James L. Kennedy<sup>105,106,107</sup>, Andrey Khrunin<sup>108</sup>, Yunjung Kim<sup>51</sup>, Janis Klovins<sup>109</sup>, James A. Knowles<sup>110</sup>, Bettina Konte<sup>81</sup>, Vaidutis Kucinskas<sup>111</sup>, Zita Ausrele Kucinskiene<sup>111</sup>, Hana Kuzelova-Ptackova<sup>112</sup>, Anna K. Kähler<sup>26</sup>, Claudine Laurent<sup>19,113</sup>, Jimmy Lee Chee Keong<sup>47,114</sup>, S. Hong Lee<sup>87</sup>, Sophie E. Legge<sup>6</sup>, Bernard Lerer<sup>115</sup>, Miaoxin Li<sup>43,44,116</sup>, Tao Li<sup>117</sup>, Kung-Yee Liang<sup>118</sup>, Jeffrey Lieberman<sup>119</sup>, Svetlana Limborska<sup>108</sup>, Carmel M. Loughland<sup>39,120</sup>, Jan Lubinski<sup>121</sup>, Jouko Lönnqvist<sup>122</sup>, Milan Macek Jr<sup>112</sup>, Patrik K. E. Magnusson<sup>26</sup>, Brion S. Maher<sup>123</sup>, Wolfgang Maier<sup>124</sup>, Jacques Mallet<sup>125</sup>, Sara Marsal<sup>100</sup>, Manuel Mattheisen<sup>17,58,59,126</sup>, Morten Mattingsda<sup>114,127</sup>, Robert W. McCarley<sup>128,129</sup>, Colm McDonald<sup>130</sup>, Andrew M. McIntosh<sup>131,132</sup>, Sandra Meier<sup>77</sup>, Carin J. Meijer<sup>88</sup>, Bela Melegh<sup>24,25</sup>, Ingrid Melle<sup>14,133</sup>, Raquella I. Meshulam-Gately<sup>128,134</sup>, Andres Metspalu<sup>135</sup>, Patricia T. Michie<sup>39,136</sup>, Lili Milani<sup>135</sup>, Vihra Milanova<sup>137</sup>, Younes Mokrab<sup>8</sup>, Derek W. Morris<sup>5,63</sup>, Ole Mors<sup>17,58,138</sup>, Kieran C. Murphy<sup>139</sup>, Robin M. Murray<sup>140</sup>, Inez Myin-Germeys<sup>141</sup>, Bertram Müller-Myhsok<sup>142,143,144</sup>, Mari Nelis<sup>135</sup>, Igor Nenadic<sup>145</sup>, Deborah A. Nertney<sup>146</sup>, Gerald Nestadt<sup>147</sup>, Kristin K. Nicodemus<sup>148</sup>, Liene Nikitina-Zake<sup>109</sup>, Laura Nisenbaum<sup>149</sup>, Annelie Nordin<sup>150</sup>, Eadbhard O'Callaghan<sup>151</sup>, Colm O'Dushlaine<sup>2</sup>, F. Anthony O'Neill<sup>152</sup>, Sang-Yun Oh<sup>153</sup>, Ann Olincy<sup>79</sup>, Line Olsen<sup>17,90</sup>, Jim Van Os<sup>141,154</sup>, Psychosis Endophenotypes International Consortium<sup>155</sup>, Christos Pantelis<sup>39,156</sup>, George N. Papadimitriou<sup>60</sup>, Sergi Papio<sup>123</sup>, Elena Parkhomenko<sup>36</sup>, Michele T. Pato<sup>110</sup>, Tiina Paunio<sup>157,158</sup>, Milica Pejovic-Milovancevic<sup>159</sup>, Diana O. Perkins<sup>160</sup>, Olli Pietiläinen<sup>158,161</sup>, Jonathan Pimm<sup>53</sup>, Andrew J. Pocklington<sup>6</sup>, John Powell<sup>140</sup>, Alkes Price<sup>3,162</sup>, Ann E. Pulver<sup>147</sup>, Shaun M. Purcell<sup>82</sup>, Digby Quested<sup>163</sup>, Henrik B.

Rasmussen<sup>17,90</sup>, Abraham Reichenberg<sup>36</sup>, Mark A. Reimers<sup>164</sup>, Alexander L. Richards<sup>6</sup>, Joshua L. Roffman<sup>30,32</sup>, Panos Roussos<sup>82,165</sup>, Douglas M. Ruderfer<sup>6,82</sup>, Veikko Salomaa<sup>71</sup>, Alan R. Sanders<sup>64,65</sup>, Ulrich Schall<sup>39,120</sup>, Christian R. Schubert<sup>166</sup>, Thomas G. Schulze<sup>77,167</sup>, Sibylle G. Schwab<sup>168</sup>, Edward M. Scolnick<sup>2</sup>, Rodney J. Scott<sup>39,169,170</sup>, Larry J. Seidman<sup>128,134</sup>, Jianxin Shi<sup>171</sup>, Engilbert Sigurdsson<sup>172</sup>, Teimuraz Silagadze<sup>173</sup>, Jeremy M. Silverman<sup>36,174</sup>, Kang Sim<sup>47</sup>, Petr Slominsky<sup>108</sup>, Jordan W. Smoller<sup>2,4</sup>, Hon-Cheong So<sup>43</sup>, Chris C. A. Spencer<sup>175</sup>, Eli A. Stah<sup>13,82</sup>, Hreinn Stefansson<sup>176</sup>, Stacy Steinberg<sup>176</sup>, Elisabeth Stogmann<sup>177</sup>, Richard E. Straub<sup>178</sup>, Eric Strengman<sup>179,34</sup>, Jana Strohmaier<sup>77</sup>, T. Scott Stroup<sup>119</sup>, Mythily Subramaniam<sup>47</sup>, Jaana Suvisaari<sup>122</sup>, Dragan M. Svrakic<sup>48</sup>, Jin P. Szatkiewicz<sup>51</sup>, Erik Söderman<sup>12</sup>, Srinivas Thirumalai<sup>180</sup>, Draga Toncheva<sup>103</sup>, Sarah Tosato<sup>181</sup>, Juha Veijola<sup>182,183</sup>, John Waddington<sup>184</sup>, Dermot Walsh<sup>185</sup>, Dai Wang<sup>86</sup>, Qiang Wang<sup>117</sup>, Bradley T. Webb<sup>22</sup>, Mark Weiser<sup>54</sup>, Dieter B. Wildenauer<sup>186</sup>, Nigel M. Williams<sup>6</sup>, Stephanie Williams<sup>51</sup>, Stephanie H. Witt<sup>77</sup>, Aaron R. Wolen<sup>164</sup>, Emily H. M. Wong<sup>43</sup>, Brandon K. Wormley<sup>22</sup>, Hualin Simon Xi<sup>187</sup>, Clement C. Zai<sup>105,106</sup>, Xuebin Zheng<sup>188</sup>, Fritz Zimprich<sup>177</sup>, Naomi R. Wray<sup>87</sup>, Kari Stefansson<sup>176</sup>, Peter M. Visscher<sup>87</sup>, Wellcome Trust Case-Control Consortium<sup>2189</sup>, Rolf Adolfsson<sup>150</sup>, Ole A. Andreassen<sup>14,133</sup>, Douglas H. R. Blackwood<sup>132</sup>, Elvira Bramon<sup>190</sup>, Joseph D. Buxbaum<sup>35,36,91,191</sup>, Anders D. Børglum<sup>17,58,59,138</sup>, Sven Cichon<sup>55,56,95,192</sup>, Ariel Darvasi<sup>193</sup>, Enrico Domenici<sup>194</sup>, Hannelore Ehrenreich<sup>23</sup>, Tõnu Esko<sup>3,11,96,135</sup>, Pablo V. Gejman<sup>64,65</sup>, Michael Gill<sup>5</sup>, Hugh Gurling<sup>53</sup>, Christina M. Hultman<sup>26</sup>, Nakao Iwata<sup>98</sup>, Assen V. Jablensky<sup>39,102,186,195</sup>, Erik G. Jönsson<sup>12,14</sup>, Kenneth S. Kendler<sup>196</sup>, George Kirov<sup>6</sup>, Jo Knight<sup>105,106,107</sup>, ToddLencz<sup>197,198,199</sup>, Douglas F. Levinson<sup>19</sup>, Qingqin S. Li<sup>86</sup>, Jianjun Liu<sup>188,200</sup>, Anil K. Malhotra<sup>197,198,199</sup>, Steven A. McCarroll<sup>12,96</sup>, Andrew McQuillin<sup>53</sup>, Jennifer L. Moran<sup>2</sup>, Preben B. Mortensen<sup>15,16,17</sup>, Bryan J. Mowry<sup>87,201</sup>, Markus M. Nöthen<sup>55,56</sup>, Roel A. Ophoff<sup>38,80,34</sup>, Michael J. Owen<sup>6,7</sup>, Aarno Palotie<sup>2,4,161</sup>, Carlos N. Pato<sup>110</sup>, Tracey L.

Petryshen<sup>2,128,202</sup>, Danielle Posthuma<sup>203,204,205</sup>, Marcella Rietsche<sup>177</sup>, Brien P. Riley<sup>196</sup>, Dan Rujescu<sup>81,83</sup>, Pak C. Sham<sup>43,44,116</sup>, Pamela Sklar<sup>82,91,165</sup>, David St Clair<sup>206</sup>, Daniel R. Weinberger<sup>178,207</sup>, Jens R. Wendland<sup>166</sup>, Thomas Werge<sup>17,90,208</sup>, Mark J. Daly<sup>1,2,3</sup>, Patrick F. Sullivan<sup>26,51,160</sup> & Michael C. O'Donovan<sup>6,7</sup>

<sup>1</sup>Analytic and Translational Genetics Unit, Massachusetts General Hospital, Boston, Massachusetts 02114, USA. <sup>2</sup>Stanley Center for Psychiatric Research, Broad Institute of MIT and Harvard, Cambridge, Massachusetts 02142, USA. <sup>3</sup>Medical and Population Genetics Program, Broad Institute of MIT and Harvard, Cambridge, Massachusetts 02142, USA. <sup>4</sup>Psychiatric and Neurodevelopmental Genetics Unit, Massachusetts General Hospital, Boston, Massachusetts 02114, USA. <sup>5</sup>Neuropsychiatric Genetics Research Group, Department of Psychiatry, Trinity College Dublin, Dublin 8, Ireland. <sup>6</sup>MRC Centre for Neuropsychiatric Genetics and Genomics, Institute of Psychological Medicine and Clinical Neurosciences, School of Medicine, Cardiff University, Cardiff CF24 4HQ, UK. <sup>7</sup>National Centre for Mental Health, Cardiff University, Cardiff CF24 4HQ, UK. <sup>8</sup>Eli Lilly and Company Limited, Erl Wood Manor, Sunninghill Road, Windlesham, Surrey GU20 6PH, UK. <sup>9</sup>Social, Genetic and Developmental Psychiatry Centre, Institute of Psychiatry, King's College London, London SE5 8AF, UK. <sup>10</sup>Center for Biological Sequence Analysis, Department of Systems Biology, Technical University of Denmark, DK-2800, Denmark. <sup>11</sup>Division of Endocrinology and Center for Basic and Translational Obesity Research, Boston Children's Hospital, Boston, Massachusetts 02115, USA. <sup>12</sup>Department of Clinical Neuroscience, Psychiatry Section, Karolinska Institutet, SE-17176 Stockholm, Sweden. <sup>13</sup>Department of Psychiatry, Diakonhjemmet Hospital, 0319 Oslo, Norway. <sup>14</sup>NORMENT, KG Jebsen Centre for Psychosis Research, Institute of Clinical

Medicine, University of Oslo, 0424 Oslo, Norway. <sup>15</sup>Centre for Integrative Register-based Research, CIRRAU, Aarhus University, DK-8210 Aarhus, Denmark. <sup>16</sup>National Centre for Register-based Research, Aarhus University, DK-8210 Aarhus, Denmark. <sup>17</sup>The Lundbeck Foundation Initiative for Integrative Psychiatric Research, iPSYCH, Denmark. <sup>18</sup>State Mental Hospital, 85540 Haar, Germany. <sup>19</sup>Department of Psychiatry and Behavioral Sciences, Stanford University, Stanford, California 94305, USA. <sup>20</sup>Department of Psychiatry and Behavioral Sciences, Atlanta Veterans Affairs Medical Center, Atlanta, Georgia 30033, USA. <sup>21</sup>Department of Psychiatry and Behavioral Sciences, Emory University, Atlanta, Georgia, 30322, USA. <sup>22</sup>Virginia Institute for Psychiatric and Behavioral Genetics, Department of Psychiatry, Virginia Commonwealth University, Richmond, Virginia 23298, USA. <sup>23</sup>Clinical Neuroscience, Max Planck Institute of Experimental Medicine, Goettingen 37075, Germany. <sup>24</sup>Department of Medical Genetics, University of Pécs, Pécs H-7624, Hungary. <sup>25</sup>Szentagothai Research Center, University of Pécs, Pécs H-7624, Hungary. <sup>26</sup>Department of Medical Epidemiology and Biostatistics, Karolinska Institutet, Stockholm SE-17177, Sweden. <sup>27</sup>Department of Psychiatry, University of Iowa Carver College of Medicine, Iowa City, Iowa 52242, USA. <sup>28</sup>University Medical Center Groningen, Department of Psychiatry, University of Groningen NL-9700 RB, The Netherlands. <sup>29</sup>School of Nursing, Louisiana State University Health Sciences Center, New Orleans, Louisiana 70112, USA. <sup>30</sup>Athinoula A. Martinos Center, Massachusetts General Hospital, Boston, Massachusetts 02129, USA. <sup>31</sup>Center for Brain Science, Harvard University, Cambridge, Massachusetts 02138, USA. <sup>32</sup>Department of Psychiatry, Massachusetts General Hospital, Boston, Massachusetts 02114, USA. <sup>33</sup>Department of Psychiatry, University of California at San Francisco, San Francisco, California 94143, USA. <sup>34</sup>University Medical Center Utrecht, Department of Psychiatry, Rudolf Magnus Institute of Neuroscience, 3584 Utrecht, The

Netherlands. <sup>35</sup>Department of Human Genetics, Icahn School of Medicine at Mount Sinai, New York, New York 10029, USA. <sup>36</sup>Department of Psychiatry, Icahn School of Medicine at Mount Sinai, New York, New York 10029, USA. <sup>37</sup>Centre Hospitalier du Rouvray and INSERM U1079 Faculty of Medicine, 76301 Rouen, France. <sup>38</sup>Department of Human Genetics, David Geffen School of Medicine, University of California, Los Angeles, California 90095, USA.

<sup>39</sup>Schizophrenia Research Institute, Sydney NSW 2010, Australia. <sup>40</sup>School of Psychiatry, University of New South Wales, Sydney NSW 2031, Australia. <sup>41</sup>Royal Brisbane and Women's Hospital, University of Queensland, Brisbane, St Lucia QLD 4072, Australia. <sup>42</sup>Institute of Psychology, Chinese Academy of Science, Beijing 100101, China. <sup>43</sup>Department of Psychiatry, Li Ka Shing Faculty of Medicine, The University of Hong Kong, Hong Kong, China. <sup>44</sup>State Key Laboratory for Brain and Cognitive Sciences, Li Ka Shing Faculty of Medicine, The University of Hong Kong, Hong Kong, China. <sup>45</sup>Department of Computer Science, University of North Carolina, Chapel Hill, North Carolina 27514, USA. <sup>46</sup>Castle Peak Hospital, Hong Kong, China.

<sup>47</sup>Institute of Mental Health, Singapore 539747, Singapore. <sup>48</sup>Department of Psychiatry, Washington University, St. Louis, Missouri 63110, USA. <sup>49</sup>Department of Child and Adolescent Psychiatry, Assistance Publique Hopitaux de Paris, Pierre and Marie Curie Faculty of Medicine and Institute for Intelligent Systems and Robotics, Paris 75013, France. <sup>50</sup>Blue Note Biosciences, Princeton, New Jersey 08540, USA <sup>51</sup>Department of Genetics, University of North Carolina, Chapel Hill, North Carolina 27599-7264, USA. <sup>52</sup>Department of Psychological Medicine, Queen Mary University of London, London E1 1BB, UK. <sup>53</sup>Molecular Psychiatry Laboratory, Division of Psychiatry, University College London, London WC1E6JJ, UK. <sup>54</sup>Sheba Medical Center, Tel Hashomer 52621, Israel. <sup>55</sup>Department of Genomics, Life and Brain Center, D-53127 Bonn, Germany. <sup>56</sup>Institute of Human Genetics, University of Bonn, D-53127 Bonn, Germany.

<sup>57</sup>Applied Molecular Genomics Unit, VIB Department of Molecular Genetics, University of Antwerp, B-2610 Antwerp, Belgium. <sup>58</sup>Centre for Integrative Sequencing, iSEQ, Aarhus University, DK-8000 Aarhus C, Denmark. <sup>59</sup>Department of Biomedicine, Aarhus University, DK-8000 Aarhus C, Denmark. <sup>60</sup>First Department of Psychiatry, University of Athens Medical School, Athens 11528, Greece. <sup>61</sup>Department of Psychiatry, University College Cork, Co. Cork, Ireland. <sup>62</sup>Department of Medical Genetics, Oslo University Hospital, 0424 Oslo, Norway. <sup>63</sup>Cognitive Genetics and Therapy Group, School of Psychology and Discipline of Biochemistry, National University of Ireland Galway, Co. Galway, Ireland. <sup>64</sup>Department of Psychiatry and Behavioral Neuroscience, University of Chicago, Chicago, Illinois 60637, USA. <sup>65</sup>Department of Psychiatry and Behavioral Sciences, North Shore University Health System, Evanston, Illinois 60201, USA. <sup>66</sup>Department of Non-Communicable Disease Epidemiology, London School of Hygiene and Tropical Medicine, London WC1E 7HT, UK. <sup>67</sup>Department of Child and Adolescent Psychiatry, University Clinic of Psychiatry, Skopje 1000, Republic of Macedonia. <sup>68</sup>Department of Psychiatry, University of Regensburg, 93053 Regensburg, Germany. <sup>69</sup>Department of General Practice, Helsinki University Central Hospital, University of Helsinki P.O. Box 20, Tukholmankatu 8 B, FI-00014, Helsinki, Finland <sup>70</sup>Folkhälsan Research Center, Helsinki, Finland, BiomedicumHelsinki 1, Haartmaninkatu 8, FI-00290, Helsinki, Finland. <sup>71</sup>National Institute for Health and Welfare, P.O. Box 30, FI-00271 Helsinki, Finland. <sup>72</sup>Translational Technologies and Bioinformatics, Pharma Research and Early Development, F. Hoffman-La Roche, CH-4070 Basel, Switzerland. <sup>73</sup>Department of Psychiatry, Georgetown University School of Medicine, Washington DC 20057, USA. <sup>74</sup>Department of Psychiatry, Keck School of Medicine of the University of Southern California, Los Angeles, California 90033, USA. <sup>75</sup>Department of Psychiatry, Virginia Commonwealth University School of Medicine,

Richmond, Virginia 23298, USA. <sup>76</sup>Mental Health Service Line, Washington VA Medical Center, Washington DC 20422, USA. <sup>77</sup>Department of Genetic Epidemiology in Psychiatry, Central Institute of Mental Health, Medical Faculty Mannheim, University of Heidelberg, Heidelberg, D-68159 Mannheim, Germany. <sup>78</sup>Department of Genetics, University of Groningen, University Medical Centre Groningen, 9700 RB Groningen, The Netherlands. <sup>79</sup>Department of Psychiatry, University of Colorado Denver, Aurora, Colorado 80045, USA. <sup>80</sup>Center for Neurobehavioral Genetics, Semel Institute for Neuroscience and Human Behavior, University of California, Los Angeles, California 90095, USA. <sup>81</sup>Department of Psychiatry, University of Halle, 06112 Halle, Germany. <sup>82</sup>Division of Psychiatric Genomics, Department of Psychiatry, Icahn School of Medicine at Mount Sinai, New York, New York, New York 10029, USA. <sup>83</sup>Department of Psychiatry, University of Munich, 80336, Munich, Germany. <sup>84</sup>Departments of Psychiatry and Human and Molecular Genetics, INSERM, Institut de Myologie, Hôpital de la Pitié-Salpêtrière, Paris 75013, France. <sup>85</sup>Mental Health Research Centre, Russian Academy of Medical Sciences, 115522 Moscow, Russia. <sup>86</sup>Neuroscience Therapeutic Area, Janssen Research and Development, Raritan, New Jersey 08869, USA. <sup>87</sup>Queensland Brain Institute, The University of Queensland, Brisbane, Queensland, QLD 4072, Australia. <sup>88</sup>Academic Medical Centre University of Amsterdam, Department of Psychiatry, 1105 AZ Amsterdam, The Netherlands. <sup>89</sup>Illumina, La Jolla, California, California 92122, USA. <sup>90</sup>Institute of Biological Psychiatry, Mental Health Centre Sct.Hans, Mental Health Services Copenhagen, DK-4000, Denmark. <sup>91</sup>Friedman Brain Institute, Icahn School of Medicine at Mount Sinai, New York, New York 10029, USA. <sup>92</sup>J. J. Peters VA Medical Center, Bronx, New York, New York 10468, USA. <sup>93</sup>Priority Research Centre for Health Behaviour, University of Newcastle, Newcastle NSW 2308, Australia. <sup>94</sup>School of Electrical Engineering and Computer Science, University of



Newcastle, Newcastle NSW 2308, Australia. <sup>95</sup>Division of Medical Genetics, Department of Biomedicine, University of Basel, Basel CH-4058, Switzerland. <sup>96</sup>Department of Genetics, Harvard Medical School, Boston, Massachusetts, Massachusetts 02115, USA. <sup>97</sup>Section of Neonatal Screening and Hormones, Department of Clinical Biochemistry, Immunology and Genetics, Statens Serum Institut, Copenhagen DK-2300, Denmark. <sup>98</sup>Department of Psychiatry, Fujita Health University School of Medicine, Toyoake, Aichi, 470-1192, Japan. <sup>99</sup>Regional Centre for Clinical Research in Psychosis, Department of Psychiatry, Stavanger University Hospital, 4011 Stavanger, Norway. <sup>100</sup>Rheumatology Research Group, Vall d'Hebron Research Institute, Barcelona 08035, Spain. <sup>101</sup>Centre for Medical Research, The University of Western Australia, Perth WA6009, Australia. <sup>102</sup>The Perkins Institute for Medical Research, The University of Western Australia, Perth WA6009, Australia. <sup>103</sup>Department of Medical Genetics, Medical University, Sofia 1431, Bulgaria. <sup>104</sup>Department of Psychology, University of Colorado Boulder, Boulder, Colorado 80309, USA. <sup>105</sup>Campbell Family Mental Health Research Institute, Centre for Addiction and Mental Health, Toronto, Ontario M5T 1R8, Canada. <sup>106</sup>Department of Psychiatry, University of Toronto, Toronto, Ontario M5T 1R8, Canada. <sup>107</sup>Institute of Medical Science, University of Toronto, Toronto, Ontario M5S 1A8, Canada. <sup>108</sup>Institute of Molecular Genetics, Russian Academy of Sciences, Moscow 123182, Russia. <sup>109</sup>Latvian Biomedical Research and Study Centre, Riga, LV-1067, Latvia. <sup>110</sup>Department of Psychiatry and Zilkha Neurogenetics Institute, Keck School of Medicine at University of Southern California, Los Angeles, California 90089, USA. <sup>111</sup>Faculty of Medicine, Vilnius University, LT-01513 Vilnius, Lithuania. <sup>112</sup>Department of Biology and Medical Genetics, 2nd Faculty of Medicine and University Hospital Motol, 150 06 Prague, Czech Republic. <sup>113</sup>Department of Child and Adolescent Psychiatry, Pierre and Marie Curie Faculty of Medicine, Paris 75013, France.

<sup>114</sup>Duke-NUS Graduate Medical School, Singapore 169857. <sup>115</sup>Department of Psychiatry, Hadassah-Hebrew University Medical Center, Jerusalem 91120, Israel. <sup>116</sup>Centre for Genomic Sciences, The University of Hong Kong, Hong Kong, China. <sup>117</sup>Mental Health Centre and Psychiatric Laboratory, West China Hospital, Sichuan University, Chengdu, 610041 Sichuan, China. <sup>118</sup>Department of Biostatistics, Johns Hopkins University Bloomberg School of Public Health, Baltimore, Maryland 21205, USA. <sup>119</sup>Department of Psychiatry, Columbia University, New York, New York 10032, USA. <sup>120</sup>Priority Centre for Translational Neuroscience and Mental Health, University of Newcastle, Newcastle NSW2300, Australia. <sup>121</sup>Department of Genetics and Pathology, International Hereditary Cancer Center, Pomeranian Medical University in Szczecin, 70-453 Szczecin, Poland. <sup>122</sup>Department of Mental Health and Substance Abuse Services; National Institute for Health and Welfare, P.O. BOX30, FI-00271 Helsinki, Finland. <sup>123</sup>Department of Mental Health, Bloomberg School of Public Health, Johns Hopkins University, Baltimore, Maryland 21205, USA. <sup>124</sup>Department of Psychiatry, University of Bonn, D-53127 Bonn, Germany. <sup>125</sup>Centre National de la Recherche Scientifique, Laboratoire de Génétique Moléculaire de la Neurotransmission et des Processus Neurodégénératifs, Hôpital de la Pitié Salpêtrière, 75013 Paris, France. <sup>126</sup>Department of Genomics Mathematics, University of Bonn, D-53127 Bonn, Germany. <sup>127</sup>Research Unit, Sørlandet Hospital, 4604 Kristiansand, Norway. <sup>128</sup>Department of Psychiatry, Harvard Medical School, Boston, Massachusetts 02115, USA. <sup>129</sup>VA Boston Health Care System, Brockton, Massachusetts 02301, USA. <sup>130</sup>Department of Psychiatry, National University of Ireland Galway, Co. Galway, Ireland. <sup>131</sup>Centre for Cognitive Ageing and Cognitive Epidemiology, University of Edinburgh, Edinburgh EH16 4SB, UK. <sup>132</sup>Division of Psychiatry, University of Edinburgh, Edinburgh EH16 4SB, UK. <sup>133</sup>Division of Mental Health and Addiction, Oslo University Hospital, 0424 Oslo, Norway. <sup>134</sup>Massachusetts

Mental Health Center Public Psychiatry Division of the Beth Israel Deaconess Medical Center, Boston, Massachusetts 02114, USA. <sup>135</sup>Estonian Genome Center, University of Tartu, Tartu 50090, Estonia. <sup>136</sup>School of Psychology, University of Newcastle, NewcastleNSW2308, Australia. <sup>137</sup>First Psychiatric Clinic, Medical University, Sofia 1431, Bulgaria. <sup>138</sup>Department P, Aarhus University Hospital, DK-8240 Risskov, Denmark. <sup>139</sup>Department of Psychiatry, Royal College of Surgeons in Ireland, Dublin 2, Ireland. <sup>140</sup>King's College London, London SE5 8AF, UK. <sup>141</sup>Maastricht University Medical Centre, South Limburg Mental Health Research and Teaching Network, EURON, 6229 HX Maastricht, The Netherlands. <sup>142</sup>Institute of Translational Medicine, University of Liverpool, Liverpool L69 3BX, UK. <sup>143</sup>Max Planck Institute of Psychiatry, 80336 Munich, Germany. <sup>144</sup>Munich Cluster for Systems Neurology (SyNergy), 80336 Munich, Germany. <sup>145</sup>Department of Psychiatry and Psychotherapy, Jena University Hospital, 07743 Jena, Germany. <sup>146</sup>Department of Psychiatry, Queensland Brain Institute and Queensland Centre for Mental Health Research, University of Queensland, Brisbane, Queensland, St Lucia QLD 4072, Australia. <sup>147</sup>Department of Psychiatry and Behavioral Sciences, Johns Hopkins University School of Medicine, Baltimore, Maryland 21205, USA. <sup>148</sup>Department of Psychiatry, Trinity College Dublin, Dublin 2, Ireland. <sup>149</sup>Eli Lilly and Company, Lilly Corporate Center, Indianapolis, 46285 Indiana, USA. <sup>150</sup>Department of Clinical Sciences, Psychiatry, Umeå University, SE-901 87 Umeå, Sweden. <sup>151</sup>DETECT Early Intervention Service for Psychosis, Blackrock, Co. Dublin, Ireland. <sup>152</sup>Centre for Public Health, Institute of Clinical Sciences, Queen's University Belfast, Belfast BT12 6AB, UK. <sup>153</sup>Lawrence Berkeley National Laboratory, University of California at Berkeley, Berkeley, California 94720, USA. <sup>154</sup>Institute of Psychiatry, King's College London, London SE5 8AF, UK. <sup>156</sup>Melbourne Neuropsychiatry Centre, University of Melbourne & Melbourne Health, Melbourne, Vic 3053,

Australia. <sup>157</sup>Department of Psychiatry, University of Helsinki, P.O. Box 590, FI-00029 HUS, Helsinki, Finland. <sup>158</sup>Public Health Genomics Unit, National Institute for Health and Welfare, P.O. BOX 30, FI-00271 Helsinki, Finland <sup>159</sup>Medical Faculty, University of Belgrade, 11000 Belgrade, Serbia. <sup>160</sup>Department of Psychiatry, University of North Carolina, Chapel Hill, North Carolina 27599-7160, USA. <sup>161</sup>Institute for Molecular Medicine Finland, FIMM, University of Helsinki, P.O. Box 20FI-00014, Helsinki, Finland <sup>162</sup>Department of Epidemiology, Harvard School of Public Health, Boston, Massachusetts 02115, USA. <sup>163</sup>Department of Psychiatry, University of Oxford, Oxford, OX3 7JX, UK. <sup>164</sup>Virginia Institute for Psychiatric and Behavioral Genetics, Virginia Commonwealth University, Richmond, Virginia 23298, USA. <sup>165</sup>Institute for Multiscale Biology, Icahn School of Medicine at Mount Sinai, New York, New York 10029, USA. <sup>166</sup>PharmaTherapeutics Clinical Research, Pfizer Worldwide Research and Development, Cambridge, Massachusetts 02139, USA. <sup>167</sup>Department of Psychiatry and Psychotherapy, University of Gottingen, 37073 Göttingen, Germany. <sup>168</sup>Psychiatry and Psychotherapy Clinic, University of Erlangen, 91054 Erlangen, Germany. <sup>169</sup>Hunter New England Health Service, Newcastle NSW 2308, Australia. <sup>170</sup>School of Biomedical Sciences, University of Newcastle, Newcastle NSW 2308, Australia. <sup>171</sup>Division of Cancer Epidemiology and Genetics, National Cancer Institute, Bethesda, Maryland 20892, USA. <sup>172</sup>University of Iceland, Landspítali, National University Hospital, 101 Reykjavik, Iceland. <sup>173</sup>Department of Psychiatry and Drug Addiction, Tbilisi State Medical University (TSMU), N33, 0177 Tbilisi, Georgia. <sup>174</sup>Research and Development, Bronx Veterans Affairs Medical Center, New York, New York 10468, USA. <sup>175</sup>Wellcome Trust Centre for Human Genetics, Oxford OX3 7BN, UK. <sup>176</sup>deCODE Genetics, 101 Reykjavik, Iceland. <sup>177</sup>Department of Clinical Neurology, Medical University of Vienna, 1090 Wien, Austria. <sup>178</sup>Lieber Institute for Brain Development, Baltimore, Maryland 21205,

USA. <sup>179</sup>Department of Medical Genetics, University Medical Centre Utrecht, Universiteitsweg 100, 3584 CG, Utrecht, The Netherlands. <sup>180</sup>Berkshire Healthcare NHS Foundation Trust, Bracknell RG12 1BQ, UK. <sup>181</sup>Section of Psychiatry, University of Verona, 37134 Verona, Italy. <sup>182</sup>Department of Psychiatry, University of Oulu, P.O. Box 5000, 90014, Finland. <sup>183</sup>University Hospital of Oulu, P.O. Box 20, 90029 OYS, Finland. <sup>184</sup>Molecular and Cellular Therapeutics, Royal College of Surgeons in Ireland, Dublin 2, Ireland. <sup>185</sup>Health Research Board, Dublin 2, Ireland. <sup>186</sup>School of Psychiatry and Clinical Neurosciences, The University of Western Australia, Perth WA6009, Australia. <sup>187</sup>Computational Sciences CoE, Pfizer Worldwide Research and Development, Cambridge, Massachusetts 02139, USA. <sup>188</sup>Human Genetics, Genome Institute of Singapore, A\*STAR, Singapore 138672. <sup>190</sup>University College London, London WC1E 6BT, UK. <sup>191</sup>Department of Neuroscience, Icahn School of Medicine at Mount Sinai, New York, New York 10029, USA. <sup>192</sup>Institute of Neuroscience and Medicine (INM-1), Research Center Juelich, 52428 Juelich, Germany. <sup>193</sup>Department of Genetics, The Hebrew University of Jerusalem, 91905 Jerusalem, Israel. <sup>194</sup>Neuroscience Discovery and Translational Area, Pharma Research and Early Development, F. Hoffman-La Roche, CH-4070 Basel, Switzerland. <sup>195</sup>Centre for Clinical Research in Neuropsychiatry, School of Psychiatry and Clinical Neurosciences, The University of Western Australia, Medical Research Foundation Building, Perth WA6000, Australia. <sup>196</sup>Virginia Institute for Psychiatric and Behavioral Genetics, Departments of Psychiatry and Human and Molecular Genetics, Virginia Commonwealth University, Richmond, Virginia 23298, USA. <sup>197</sup>The Feinstein Institute for Medical Research, Manhasset, New York 11030, USA. <sup>198</sup>The Hofstra NS-LIJ School of Medicine, Hempstead, New York 11549, USA. <sup>199</sup>The Zucker Hillside Hospital, Glen Oaks, New York 11004, USA. <sup>200</sup>Saw Swee Hock School of Public Health, National University of Singapore, Singapore

117597, Singapore. <sup>201</sup>Queensland Centre for Mental Health Research, University of Queensland, Brisbane 4076, Queensland, Australia. <sup>202</sup>Center for Human Genetic Research and Department of Psychiatry, Massachusetts General Hospital, Boston, Massachusetts 02114, USA. <sup>203</sup>Department of Child and Adolescent Psychiatry, Erasmus University Medical Centre, Rotterdam 3000, The Netherlands. <sup>204</sup>Department of Complex Trait Genetics, Neuroscience Campus Amsterdam, VU University Medical Center Amsterdam, Amsterdam 1081, The Netherlands. <sup>205</sup>Department of Functional Genomics, Center for Neurogenomics and Cognitive Research, Neuroscience Campus Amsterdam, VU University, Amsterdam 1081, The Netherlands. <sup>206</sup>University of Aberdeen, Institute of Medical Sciences, Aberdeen AB25 2ZD, UK. <sup>207</sup>Departments of Psychiatry, Neurology, Neuroscience and Institute of Genetic Medicine, Johns Hopkins School of Medicine, Baltimore, Maryland 21205, USA. <sup>208</sup>Department of Clinical Medicine, University of Copenhagen, Copenhagen 2200, Denmark.

## REFERENCE

1. Gusev, A., Lee, S.H., Trynka, G., Finucane, H., Vilhjálmsón, B.J., Xu, H., Zang, C., Ripke, S., Bulik-Sullivan, B., and Stahl, E. (2014). Partitioning heritability of regulatory and cell-type-specific variants across 11 common diseases. *The American Journal of Human Genetics* 95, 535-552.
2. Schizophrenia Working Group of the Psychiatric Genomics Consortium. (2014). Biological insights from 108 schizophrenia-associated genetic loci. *Nature* 511, 421-427.
3. Delaneau, O., Marchini, J., and Zagury, J.-F. (2012). A linear complexity phasing method for thousands of genomes. *Nature methods* 9, 179-181.
4. Howie, B., Marchini, J., and Stephens, M. (2011). Genotype imputation with thousands of genomes. *G3 (Bethesda, Md)* 1, 457-470.
5. Cross-Disorder Group of the Psychiatric Genomics Consortium. (2013). Genetic relationship between five psychiatric disorders estimated from genome-wide SNPs. *Nature Genetics* 45, 984-994.
6. Mehta, D., Tropf, F.C., Gratten, J., Bakshi, A., Zhu, Z., Bacanu, S.-A., Hemani, G., Magnusson, P.K.E., Barban, N., Esko, T., et al. (2016). Evidence for genetic overlap between schizophrenia and age at first birth in women. *JAMA Psychiatry* 73, 497-505.
7. Collins, R. (2012). What makes UK Biobank special? *The Lancet* 379, 1173-1174.
8. The Genomes Project Consortium. (2015). A global reference for human genetic variation. *Nature* 526, 68-74.
9. International Stroke Genetics Consortium, and Wellcome Trust Case Control Consortium. (2012). Genome-wide association study identifies a variant in HDAC9 associated with large vessel ischemic stroke. *Nature genetics* 44, 328-333.
10. The International Multiple Sclerosis Genetics, C., Wellcome Trust Case Control, C., Sawcer, S., Hellenthal, G., Pirinen, M., Spencer, C.C.A., Patsopoulos, N.A., Moutsianas, L., Dilthey, A., Su, Z., et al. (2011). Genetic risk and a primary role for cell-mediated immune mechanisms in multiple sclerosis. *Nature* 476, 214-219.
11. Mells, G.F., Floyd, J.A.B., Morley, K.I., Cordell, H.J., Franklin, C.S., Shin, S.-Y., Heneghan, M.A., Neuberger, J.M., Donaldson, P.T., Day, D.B., et al. (2011). Genome-wide association study identifies 12 new susceptibility loci for primary biliary cirrhosis. *Nature genetics* 43, 329-332.
12. Tsoi, L.C., Spain, S.L., Knight, J., Ellinghaus, E., Stuart, P.E., Capon, F., Ding, J., Li, Y., Tejasvi, T., Gudjonsson, J.E., et al. (2012). Identification of 15 new psoriasis susceptibility loci highlights the role of innate immunity. *Nat Genet* 44, 1341-1348.
13. Lee, S.H., Weerasinghe, W.M.S.P., Wray, N.R., Goddard, M.E., and van der Werf, J.H.J. (2017). Using information of relatives in genomic prediction to apply effective stratified medicine. *Scientific Reports* 7, 42091.
14. Banda, Y., Kvale, M.N., Hoffmann, T.J., Hesselton, S.E., Ranatunga, D., Tang, H., Sabatti, C., Croen, L.A., Dispensa, B.P., Henderson, M., et al. (2015). Characterizing Race/Ethnicity and Genetic Ancestry for 100,000 Subjects in the Genetic Epidemiology Research on Adult Health and Aging (GERA) Cohort. *Genetics* 200, 1285-1295.
15. Lee, S.H., and van der Werf, J. (2016). MTG2: An efficient algorithm for multivariate linear mixed model analysis based on genomic information. *Bioinformatics* 32, 1420-1422.
16. Yang, J., Lee, S.H., Goddard, M.E., and Visscher, P.M. (2011). GCTA: A tool for genome-wide complex trait analysis. *American Journal of Human Genetics* 88, 76-82.
17. Bulik-Sullivan, B.K., Loh, P.-r., Finucane, H.K., Ripke, S., Yang, J., Schizophrenia Working Group of the Psychiatric Genomics Consortium, Patterson, N., Daly, M.J., Price, A.L., and Neale, B.M. (2015). LD Score regression distinguishes confounding from polygenicity in genome-wide association studies. *Genetics* 191, 291-295.

18. Bulik-Sullivan, B., Finucane, H.K., Anttila, V., Gusev, A., Day, F.R., Loh, P.R., ReproGen Consortium, Psychiatric Genomics Consortium, Genetic Consortium for Anorexia of the Wellcome Trust Consortium, Duncan, L., et al. (2015). An Atlas of Genetic Correlations across Human Diseases and Traits. *Nature genetics* 47, 1236-1241.
19. Zheng, J., Erzurumluoglu, A.M., Elsworth, B.L., Kemp, J.P., Howe, L., Haycock, P.C., Hemani, G., Tansey, K., Laurin, C., Pourcain, B.S., et al. (2017). LD Hub: a centralized database and web interface to perform LD score regression that maximizes the potential of summary level GWAS data for SNP heritability and genetic correlation analysis. *Bioinformatics* 33, 272-279.
20. Maier, R., Moser, G., Chen, G.-B., Ripke, S., Absher, D., Agartz, I., Akil, H., Amin, F., Andreassen, Ole A., Anjorin, A., et al. (2015). Joint Analysis of Psychiatric Disorders Increases Accuracy of Risk Prediction for Schizophrenia, Bipolar Disorder, and Major Depressive Disorder. *The American Journal of Human Genetics* 96, 283-294.
21. Finucane, H.K., Bulik-sullivan, B., Gusev, A., Trynka, G., Reshef, Y., Loh, P.-r., Anttila, V., Xu, H., Zang, C., Farh, K., et al. (2015). Partitioning heritability by functional annotation using genome-wide association summary statistics. *Nature genetics* 47, 1228-1235.
22. Locke, A.E., Kahali, B., Berndt, S.I., Justice, A.E., Pers, T.H., Day, F.R., Powell, C., Vedantam, S., Buchkovich, M.L., and Yang, J. (2015). Genetic studies of body mass index yield new insights for obesity biology. *Nature* 518, 197-206.
23. Wood, A.R., Esko, T., Yang, J., Vedantam, S., Pers, T.H., Gustafsson, S., Chu, A.Y., Estrada, K., Luan, J.a., Kutalik, Z., et al. (2014). Defining the role of common variation in the genomic and biological architecture of adult human height. *Nat Genet* 46, 1173-1186.
